# Supplementary material for: Cu-catalyzed aerobic oxidative C–CN bond cleavage of benzyl cyanide for the synthesis of primary amides
Source: Royal Society of Chemistry journal article supplement (doi:10.1039/c7ra02207g), 2017-01-01

# Supporting Information

## Cu-catalyzed aerobic oxidative C-CN bond cleavage of benzyl cyanide for the synthesis of primary amides

Xiuling Chen\*, Yanhong Peng, Yan Li, Minghu Wu, Haibing Guo, Jian Wang, Shaofa Sun\*

Non-power Nuclear Technology Collaborative Innovation Center, School of Nuclear Technology and Chemistry & Life Science, Hubei University of Science and Technology, Xianning 437100, China

[Fax: (+86)-715-8338072; E-mail: cxl828800@163.com (Dr. X. L. Chen) ; sunshaofa@mail.hbust.com.cn (Prof. S. F. Sun).]

### Contents

|                                                                                       |             |
|---------------------------------------------------------------------------------------|-------------|
| General remarks                                                                       | <b>2</b>    |
| General procedure                                                                     | <b>2</b>    |
| Optimization of reaction condition<br>Effect of catalyst loading<br>Effect of solvent | <b>2-3</b>  |
| <sup>1</sup> H and <sup>13</sup> C NMR data of products                               | <b>3-7</b>  |
| References                                                                            | <b>7</b>    |
| Copies of <sup>1</sup> H and <sup>13</sup> C NMR spectra                              | <b>8-26</b> |

## 1. General remarks

All non-aqueous reactions and manipulations were performed in air atmosphere. All solvents were dried before use. The reactions were monitored by GC (7820A, Hubei University of Science and Technology) and GC-MS (QP2010, Hunan University). The  $^1\text{H}$  NMR and  $^{13}\text{C}$  NMR spectra were recorded on a Bruker ADVANCE III spectrometer at 400 MHz and 100 MHz, respectively (Hubei University of Science and Technology). Flash column chromatography was performed using silica gel 40-70  $\mu\text{m}$  (200-300  $\mu\text{m}$ ). Benzonitriles and substituted-arylacetonitrile were purchased from Energy Chemical, Alfa Aesar, Aladdin or Maya Reagent; were dried before use. The Cu salts and amines were purchased from Energy Chemical, Aladdin.

## 2. General procedure

5 mol% Cu salts, 0.2 mmol arylacetonitrile, 0.3 mmol N-source, 0.3 mmol base were dissolved in 2 mL  $\text{CH}_3\text{CN}$  under  $\text{O}_2$  atmosphere and stirred at 120  $^\circ\text{C}$  in sealed tube (schleck tube which was sealed by a rubber septum). After completion of the reaction, the resulting solution was cooled to room temperature, washed with saturated HCl aqueous solution, and extracted with  $\text{CHCl}_3$  three times. The organic layer was dried over anhydrous  $\text{MgSO}_4$ , and concentrated under reduced pressure. The residue was purified by column chromatography on silica gel and eluted with EtOAc/petroleum ether (1/2) to afford the desired product.

## 3. Optimization of reaction conditions<sup>a</sup>

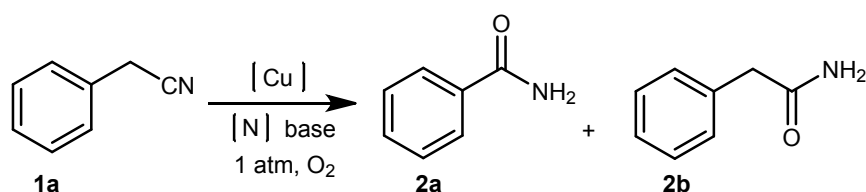

| Entry | Cat                       | [N]                                    | Base                     | Solvent                | 2a% <sup>c</sup> | 2b% <sup>b</sup> |
|-------|---------------------------|----------------------------------------|--------------------------|------------------------|------------------|------------------|
| 1     | CuCl                      | $\text{NH}_3 \cdot \text{H}_2\text{O}$ | -                        | $\text{CH}_3\text{CN}$ | 35               | 20               |
| 2     | $\text{Cu}(\text{OAc})_2$ | $\text{NH}_3 \cdot \text{H}_2\text{O}$ | -                        | $\text{CH}_3\text{CN}$ | 25               | 30               |
| 3     | CuO                       | $\text{NH}_3 \cdot \text{H}_2\text{O}$ | -                        | $\text{CH}_3\text{CN}$ | 40               | 41               |
| 4     | $\text{CuCl}_2$           | $\text{NH}_3 \cdot \text{H}_2\text{O}$ | -                        | $\text{CH}_3\text{CN}$ | 50               | 25               |
| 5     | $\text{Cu}_2\text{O}$     | $\text{NH}_3 \cdot \text{H}_2\text{O}$ | -                        | $\text{CH}_3\text{CN}$ | 50               | 31               |
| 6     | Cu                        | $\text{NH}_3 \cdot \text{H}_2\text{O}$ | -                        | $\text{CH}_3\text{CN}$ | 43               | 35               |
| 7     | $\text{Cu}_2\text{O}$     | $\text{NH}_4\text{Cl}$                 | $\text{Ba}(\text{OH})_2$ | $\text{CH}_3\text{CN}$ | 50               | <1               |
| 8     | $\text{Cu}_2\text{O}$     | $\text{NH}_4\text{Cl}$                 | KOH                      | $\text{CH}_3\text{CN}$ | 58               | <1               |
| 9     | $\text{Cu}_2\text{O}$     | $\text{NH}_4\text{Cl}$                 | $\text{Ca}(\text{OH})_2$ | $\text{CH}_3\text{CN}$ | 20               | <1               |
| 10    | $\text{Cu}_2\text{O}$     | $\text{NH}_4\text{Cl}$                 | NaOH                     | $\text{CH}_3\text{CN}$ | 88               | <1               |
| 11    | CuCl                      | $\text{NH}_4\text{Cl}$                 | NaOH                     | $\text{CH}_3\text{CN}$ | 71               | <1               |

|                 |                      |                                                 |      |                                  |       |       |
|-----------------|----------------------|-------------------------------------------------|------|----------------------------------|-------|-------|
| 12              | CuCl <sub>2</sub>    | NH <sub>4</sub> Cl                              | NaOH | CH <sub>3</sub> CN               | 65    | <1    |
| 13              | Cu(OAc) <sub>2</sub> | NH <sub>4</sub> Cl                              | NaOH | CH <sub>3</sub> CN               | 58    | <1    |
| 14              | CuBr                 | NH <sub>4</sub> Cl                              | NaOH | CH <sub>3</sub> CN               | 55    | <1    |
| 15              | CuBr <sub>2</sub>    | NH <sub>4</sub> Cl                              | NaOH | CH <sub>3</sub> CN               | 62    | <1    |
| 16              | Cu                   | NH <sub>4</sub> Cl                              | NaOH | CH <sub>3</sub> CN               | 55    | <1    |
| 17              | Cu <sub>2</sub> O    | NH <sub>4</sub> OAc                             | NaOH | CH <sub>3</sub> CN               | 63    | <1    |
| 18              | Cu <sub>2</sub> O    | (NH <sub>4</sub> ) <sub>2</sub> SO <sub>4</sub> | NaOH | CH <sub>3</sub> CN               | 50    | <1    |
| 19              | Cu <sub>2</sub> O    | (NH <sub>4</sub> ) <sub>2</sub> CO <sub>3</sub> | NaOH | CH <sub>3</sub> CN               | 71    | <1    |
| 20              | Cu <sub>2</sub> O    | Urea                                            | NaOH | CH <sub>3</sub> CN               | <1    | <1    |
| 21              | Cu <sub>2</sub> O    | NH <sub>4</sub> Cl                              | -    | CH <sub>3</sub> CN               | --    | <1    |
| 22              | -                    | NH <sub>4</sub> Cl                              | NaOH | CH <sub>3</sub> CN               | --    | <1    |
| 23              | Cu <sub>2</sub> O    | NH <sub>4</sub> Cl                              | NaOH | Toluene                          | 20    | <1    |
| 24              | Cu <sub>2</sub> O    | NH <sub>4</sub> Cl                              | NaOH | 1,4-dioxane                      | 33    | <1    |
| 25              | Cu <sub>2</sub> O    | NH <sub>4</sub> Cl                              | NaOH | THF                              | 36    | <1    |
| 26              | Cu <sub>2</sub> O    | NH <sub>4</sub> Cl                              | NaOH | DMF                              | 13    | <1    |
| 27              | Cu <sub>2</sub> O    | NH <sub>4</sub> Cl                              | NaOH | DMSO                             | trace | <1    |
| 28              | Cu <sub>2</sub> O    | NH <sub>4</sub> Cl                              | NaOH | DCE                              | 21    | <1    |
| 29              | Cu <sub>2</sub> O    | NH <sub>4</sub> Cl                              | NaOH | C <sub>2</sub> H <sub>5</sub> OH | trace | <1    |
| 30 <sup>c</sup> | Cu <sub>2</sub> O    | NH <sub>4</sub> Cl                              | NaOH | CH <sub>3</sub> CN               | trace | trace |

<sup>a</sup>Reaction conditions: 2-phenylacetonitrile **1a** (0.2 mmol), cat (5 mol%), N source (0.3 mmol), base (0.4 mmol), CH<sub>3</sub>CN (2 ml), in 25 mL schlenk tube, 120 °C, O<sub>2</sub> (1 atm), 30 h. <sup>b</sup>Yields were determined by GC using *n*-hexadecane as an internal standard. <sup>c</sup>Air was used as oxidant.

#### 4. <sup>1</sup>H NMR and <sup>13</sup>C NMR data of products

##### benzamide (**2a**)<sup>1</sup>

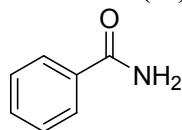

Following the general procedure (EtOAc/petroleum ether 1:2), **2a** was obtained as a white solid, isolated yield: 82%. <sup>1</sup>H NMR (DMSO-*d*, 400 MHz): δ 8.04 (s, 1H), 7.88 (d, 1H, *J* = 7.6 Hz), 7.50 (d, 2H, *J* = 7.0 Hz), 7.43 (d, 2H, *J* = 7.6 Hz), 7.40 (s, 1H); <sup>13</sup>C NMR (DMSO-*d*, 100 MHz): δ 168.7, 134.5, 131.8, 128.7, 127.9; GC-MS: *m/z*=121.

##### 4-methylbenzamide (**2b**)<sup>1</sup>

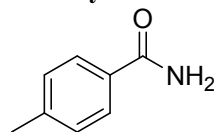

Following the general procedure (EtOAc/petroleum ether 1:2), **2b** was obtained as a white solid, isolated yield: 81%. <sup>1</sup>H NMR (DMSO-*d*, 400 MHz): δ 7.73 (d, 1H, *J* = 8.0 Hz), 7.26 (d, 2H, *J* = 8.0 Hz), 6.19 (s, 2H), 2.42 (s, 3H); <sup>13</sup>C NMR (DMSO-*d*, 100 MHz): δ 169.7, 142.6, 129.3, 129.1, 127.4, 21.5; GC-MS: *m/z*=135.

##### 4-methoxybenzamide (**2c**)<sup>1</sup>

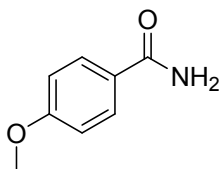

Following the general procedure (EtOAc/petroleum ether 1:2), **2c** was obtained as a white solid, isolated yield: 79%. <sup>1</sup>H NMR (DMSO-*d*, 400 MHz):  $\delta$  7.78 (d, 1H, *J* = 8.4 Hz), 6.93 (d, 2H, *J* = 8.4 Hz), 5.94 (br, 2H), 3.85 (s, 3H); <sup>13</sup>C NMR (DMSO-*d*, 100 MHz):  $\delta$  168.9, 162.6, 129.3, 125.6, 113.8, 55.4; GC-MS: *m/z*=151.

#### 4-fluorobenzamide (**2e**)<sup>1</sup>

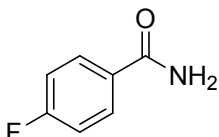

Following the general procedure (EtOAc/petroleum ether 1:2), **2e** was obtained as a white solid, isolated yield: 81%. <sup>1</sup>H NMR (DMSO-*d*, 400 MHz):  $\delta$  8.02 (s, 1H), 7.93-7.97 (m, 2H), 7.42 (s, 1H), 7.26 (t, 2H, *J* = 8.4 Hz); <sup>19</sup>F NMR (376 MHz, DMSO-*d*):  $\delta$  -109.51 (s, F); <sup>13</sup>C NMR (DMSO-*d*, 100 MHz):  $\delta$  167.4, 164.4 (d, *J* = 146.9 Hz), 131.1 (d, *J* = 2.9 Hz), 130.4 (d, *J* = 9.0 Hz), 115.5 (d, *J* = 21.6 Hz); GC-MS: *m/z*=139.

#### 4-chlorobenzamid (**2f**)<sup>1</sup>

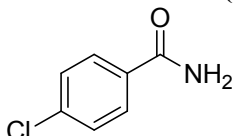

Following the general procedure (EtOAc/petroleum ether 1:2), **2f** was obtained as a white solid, isolated yield: 78%. <sup>1</sup>H NMR (DMSO-*d*, 400 MHz):  $\delta$  8.05 (s, 1H), 7.82 (d, 1H, *J* = 8.4 Hz), 7.65 (d, 2H, *J* = 8.4 Hz), 7.46 (s, 1H); <sup>13</sup>C NMR (DMSO-*d*, 100 MHz):  $\delta$  167.5, 133.9, 131.7, 130.1, 125.5; GC-MS: *m/z*=155.

#### 4-bromobenzamide (**2g**)<sup>1</sup>

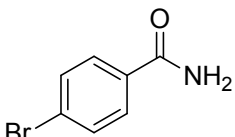

Following the general procedure (EtOAc/petroleum ether 1:2), **2g** was obtained as a white solid, isolated yield: 83%. <sup>1</sup>H NMR (DMSO-*d*, 400 MHz):  $\delta$  8.04 (s, 1H), 7.81 (d, 1H, *J* = 8.0 Hz), 7.65 (d, 2H, *J* = 8.0 Hz), 7.45 (s, 1H); <sup>13</sup>C NMR (DMSO-*d*, 100 MHz):  $\delta$  167.4, 133.9, 131.7, 130.1, 125.5; GC-MS: *m/z*=198.

#### 4-iodobenzamide (**2h**)<sup>2</sup>

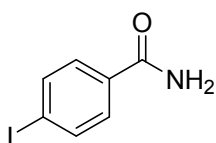

Following the general procedure (EtOAc/petroleum ether 1:2), **2h** was obtained as a white solid, isolated yield: 69%. <sup>1</sup>H NMR (DMSO-*d*, 400 MHz):  $\delta$  8.02 (s, 1H), 7.83

(d, 1H,  $J = 8.4$  Hz), 7.65 (d, 2H,  $J = 8.4$  Hz), 7.42 (s, 1H);  $^{13}\text{C}$  NMR (DMSO- $d$ , 100 MHz):  $\delta$  167.7, 137.6, 134.2, 129.9, 99.3; GC-MS:  $m/z=246$ .

#### 4-(trifluoromethyl)benzamide (**2i**)<sup>1</sup>

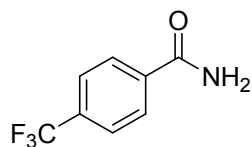

Following the general procedure (EtOAc/petroleum ether 1:2), **2i** was obtained as a white solid, isolated yield: 78%.  $^1\text{H}$  NMR (DMSO- $d$ , 400 MHz):  $\delta$  8.20 (s, 1H), 8.06 (d, 1H,  $J = 8.4$  Hz), 7.82 (d, 2H,  $J = 8.0$  Hz), 7.63 (s, 1H);  $^{19}\text{F}$  NMR (376 MHz, DMSO- $d$ ):  $\delta$  -61.38 (s, 3F);  $^{13}\text{C}$  NMR (DMSO- $d$ , 100 MHz):  $\delta$  167.2, 138.5, 131.6 (d,  $J = 31.8$  Hz), 128.8, 125.6 (q,  $J = 3.7$  Hz), 123.1; GC-MS:  $m/z=189$ .

#### [1,1'-biphenyl]-4-carboxamide (**2j**)<sup>1</sup>

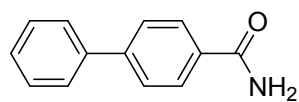

Following the general procedure (EtOAc/petroleum ether 1:2), **2j** was obtained as a white solid, isolated yield: 73%.  $^1\text{H}$  NMR (DMSO- $d$ , 400 MHz):  $\delta$  8.04 (s, 1H), 7.96 (d, 1H,  $J = 8.0$  Hz), 7.73 (t, 2H,  $J = 9.2$  Hz), 7.48 (t, 1H,  $J = 7.2$  Hz), 7.41 (d, 1H,  $J = 7.2$  Hz), 7.38 (s, 1H);  $^{13}\text{C}$  NMR (DMSO- $d$ , 100 MHz):  $\delta$  168.1, 143.2, 139.7, 133.5, 129.5, 128.8, 128.6, 128.5, 127.3, 126.9, 125.8; GC-MS:  $m/z=197$ .

#### 4-nitrobenzamide (**2k**)<sup>1</sup>

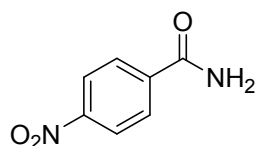

Following the general procedure (EtOAc/petroleum ether 1:2), **2k** was obtained as a white solid, isolated yield: 92%.  $^1\text{H}$  NMR (DMSO- $d$ , 400 MHz):  $\delta$  8.27 (t, 3H,  $J = 8.4$  Hz), 8.06 (d, 2H,  $J = 8.4$  Hz), 7.71 (s, 1H);  $^{13}\text{C}$  NMR (DMSO- $d$ , 100 MHz):  $\delta$  166.9, 149.5, 140.4, 129.4, 123.9; GC-MS:  $m/z=166$ .

#### 1-naphthamide (**2l**)<sup>1</sup>

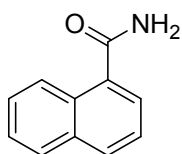

Following the general procedure (EtOAc/petroleum ether 1:2), **2l** was obtained as a white solid, isolated yield: 57%. <sup>1</sup>H NMR (DMSO-*d*<sub>6</sub>, 400 MHz): δ 8.49 (s, 1H), 8.14 (s, 1H), 7.97-8.02 (m, 4H), 7.58-7.62 (m, 2H), 7.47 (s, 1H); <sup>13</sup>C NMR (DMSO-*d*<sub>6</sub>, 100 MHz): δ 168.8, 134.7, 132.6, 131.9, 129.3, 128.3, 128.2, 128.1, 128.0, 127.1, 124.9; GC-MS: m/z=171.

### 2-naphthamide(2m)<sup>1</sup>

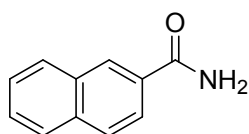

Following the general procedure (EtOAc/petroleum ether 1:2), **2m** was obtained as a white solid, isolated yield: 71%. <sup>1</sup>H NMR (DMSO-*d*<sub>6</sub>, 400 MHz): δ 8.46 (d, 1H, *J* = 14.4 Hz), 8.20 (s, 1H), 7.95 (d, 4H, *J* = 14.0 Hz), 7.7 (t, 2H, *J* = 3.2 Hz), 7.49 (s, 1H); <sup>13</sup>C NMR (DMSO-*d*<sub>6</sub>, 100 MHz): δ 168.4, 134.6, 132.6, 131.9, 129.3, 128.32, 128.29, 128.1, 128.0, 127.2, 124.8; GC-MS: m/z=171.

### thiophene-2-carboxamide (2n)<sup>1</sup>

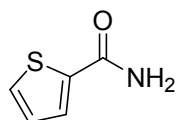

Following the general procedure (EtOAc/petroleum ether 1:2), **2n** was obtained as a white solid, isolated yield: 63%. <sup>1</sup>H NMR (DMSO-*d*<sub>6</sub>, 400 MHz): δ 7.97 (s, 1H), 7.74 (t, 2H, *J* = 4.2 Hz), 7.38 (s, 1H), 7.13 (t, 1H, *J* = 4.4 Hz); <sup>13</sup>C NMR (DMSO-*d*<sub>6</sub>, 100 MHz): δ 163.4, 140.8, 131.5, 129.1, 128.4; GC-MS: m/z=127.

### Picolinamide (2o)<sup>1</sup>

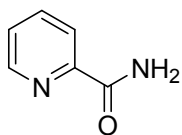

Following the general procedure (EtOAc/petroleum ether 1:2), **2o** was obtained as a white solid, isolated yield: 72%. <sup>1</sup>H NMR (DMSO-*d*<sub>6</sub>, 400 MHz): δ 8.62 (d, 1H, *J* = 4.4 Hz), 8.13 (s, 1H), 8.04 (d, 1H, *J* = 7.6 Hz), 7.94 (t, 1H, *J* = 7.6 Hz), 7.66 (s, 1H), 7.58 (t, 1H, *J* = 6.0 Hz); <sup>13</sup>C NMR (DMSO-*d*<sub>6</sub>, 100 MHz): δ 166.5, 150.7, 148.9, 138.1, 126.9, 122.4; GC-MS: m/z=122.

### 3-methylbenzamide (2p)<sup>1</sup>

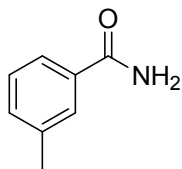

Following the general procedure (EtOAc/petroleum ether 1:2), **2p** was obtained as a white solid, isolated yield: 71%. <sup>1</sup>H NMR (DMSO-*d*<sub>6</sub>, 400 MHz): δ 7.65 (s, 1H), 7.59 (t, 1H, *J* = 8.4 Hz), 7.29-7.33 (m, 2H), 6.42 (s, 2H); <sup>13</sup>C NMR (DMSO-*d*<sub>6</sub>, 100 MHz): δ 170.1, 138.5, 133.4, 132.7, 128.5, 128.1, 124.3, 21.3; GC-MS: *m/z*=135.

### 2-methylbenzamide (**2q**)<sup>3</sup>

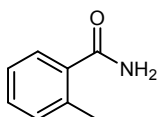

Following the general procedure (EtOAc/petroleum ether 1:2), **2q** was obtained as a white solid, isolated yield: 35%. <sup>1</sup>H NMR (DMSO-*d*<sub>6</sub>, 400 MHz): δ 7.74 (s, 1H), 7.29-7.35 (m, 3H), 7.20 (t, 2H, *J* = 8.8 Hz); <sup>13</sup>C NMR (DMSO-*d*<sub>6</sub>, 100 MHz): δ 172.0, 137.1, 135.6, 131.0, 129.8, 127.4, 126.0, 20.0; GC-MS: *m/z*=135.

## 5. References

1. S. U. Dighe and S. Batra, *Adv. Synth. Catal.*, 2016, **358**, 500-505.
2. S. Shimokawa, Y. Kawagoe, K. Moriyama and H. Togo, *Org. Lett.*, 2016, **18**, 784-787.
3. Y. Wang, K. Yamaguchi and N. Mizuno, *Angew. Chem. Int. Ed.*, 2012, **51**, 7250-7253.

## 6. Copies of $^1\text{H}$ , $^{13}\text{C}$ NMR and $^{19}\text{F}$ NMR spectra

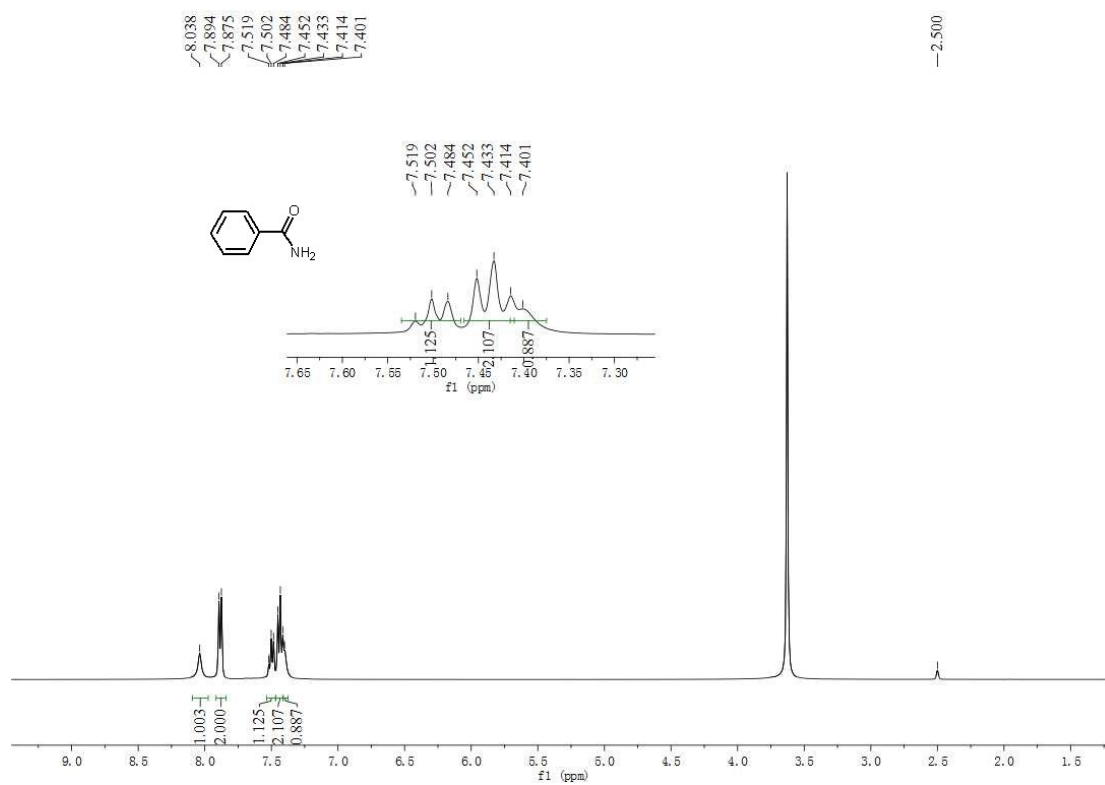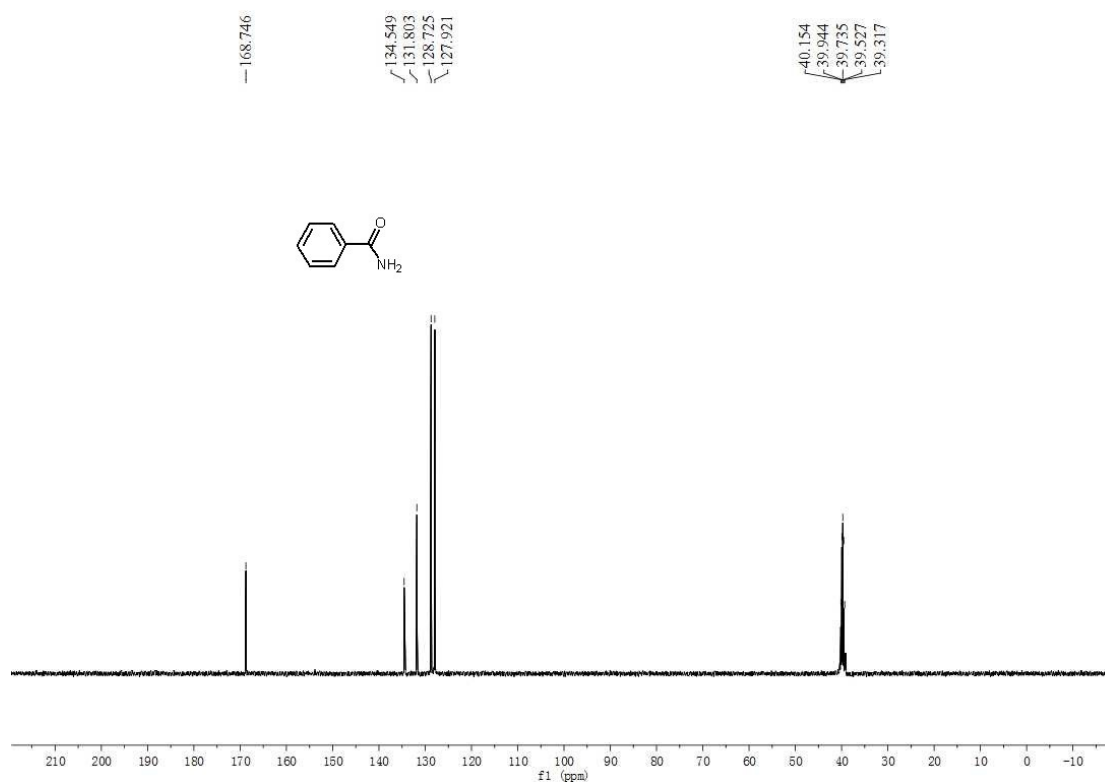



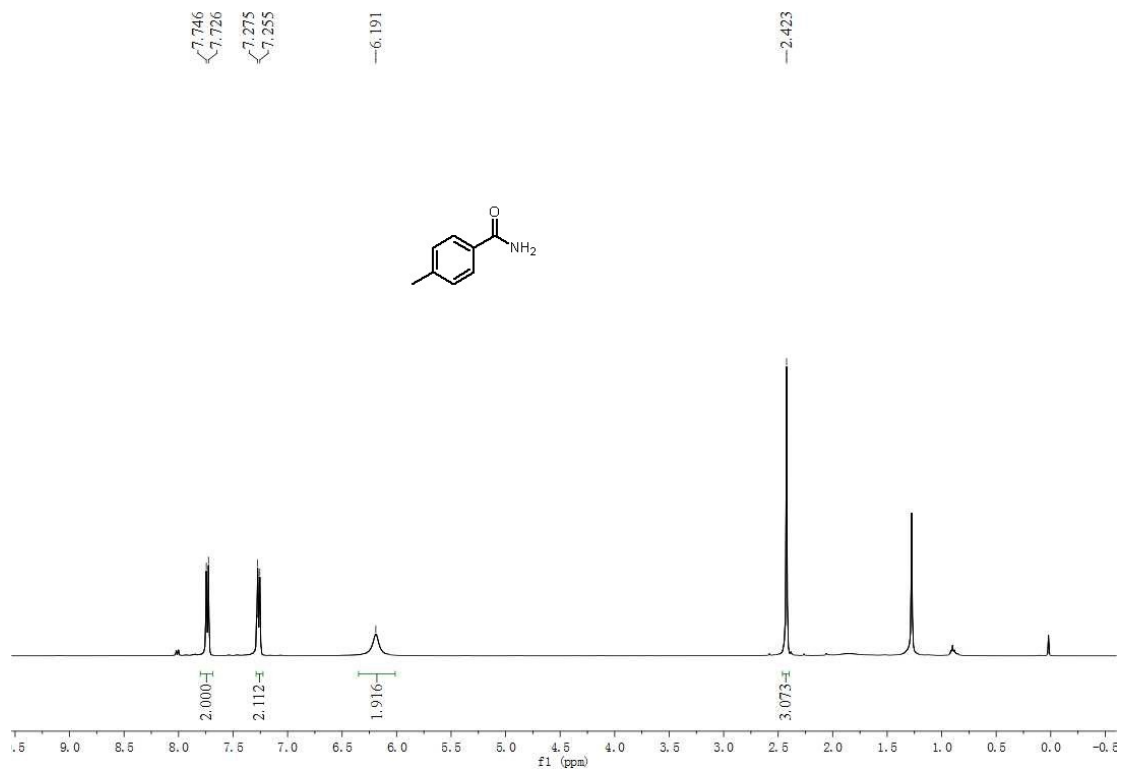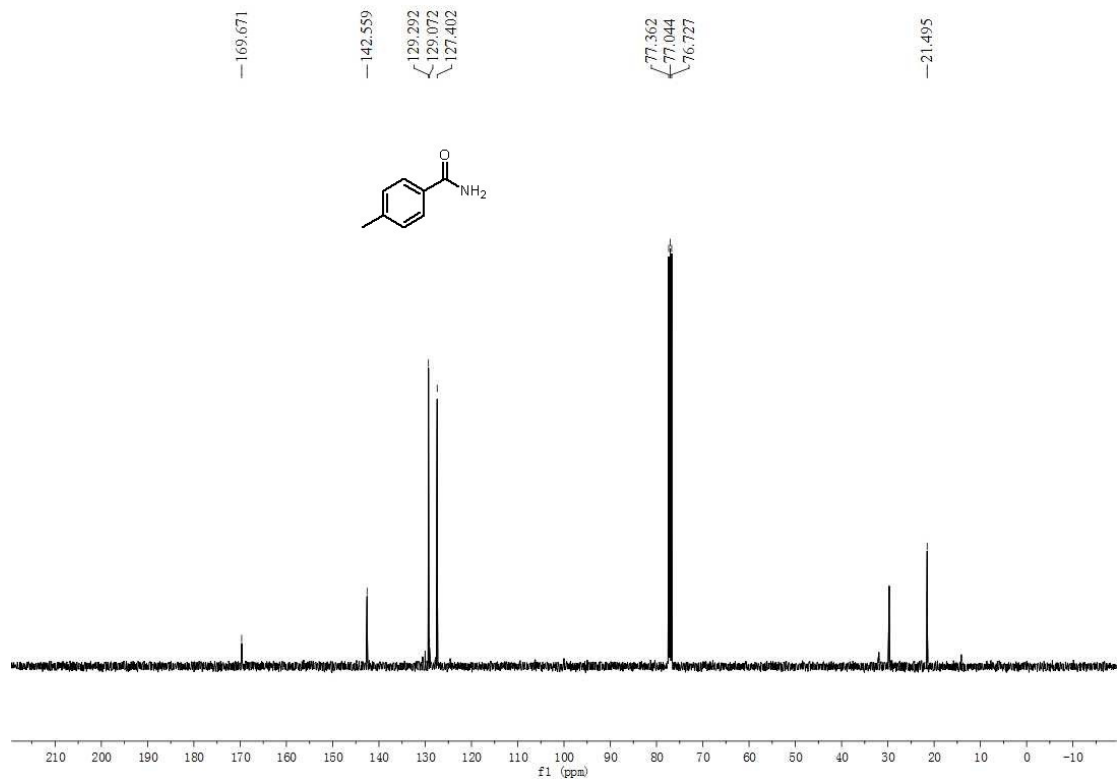

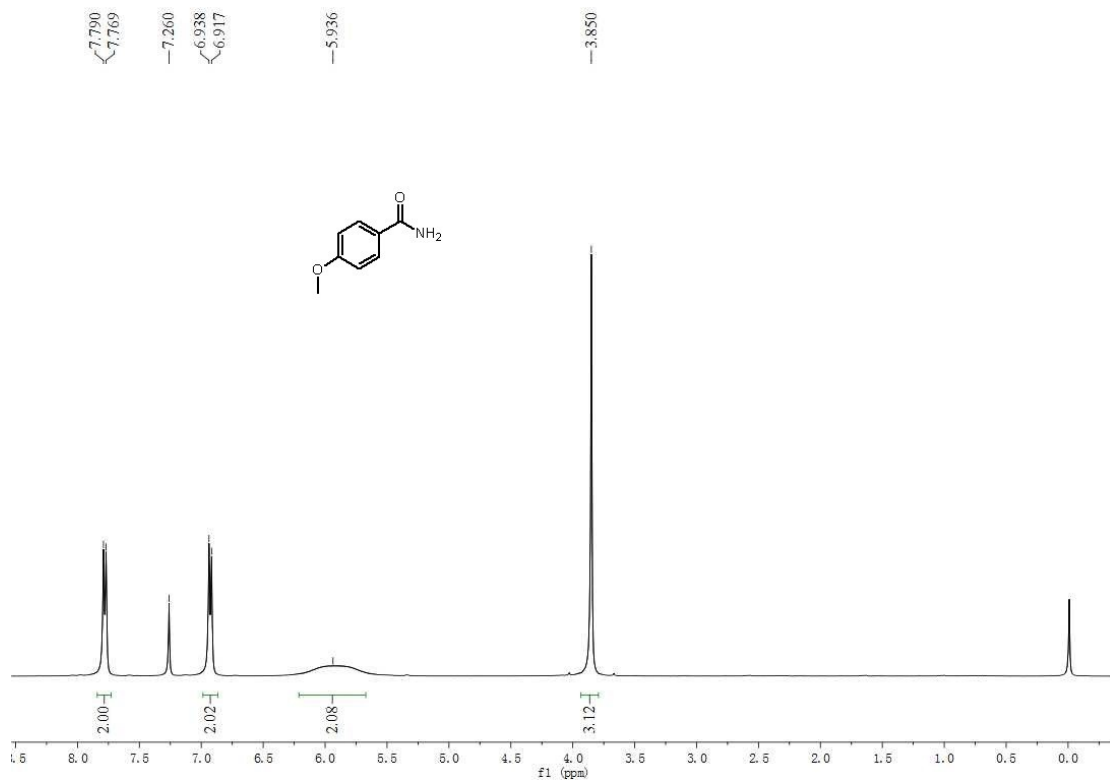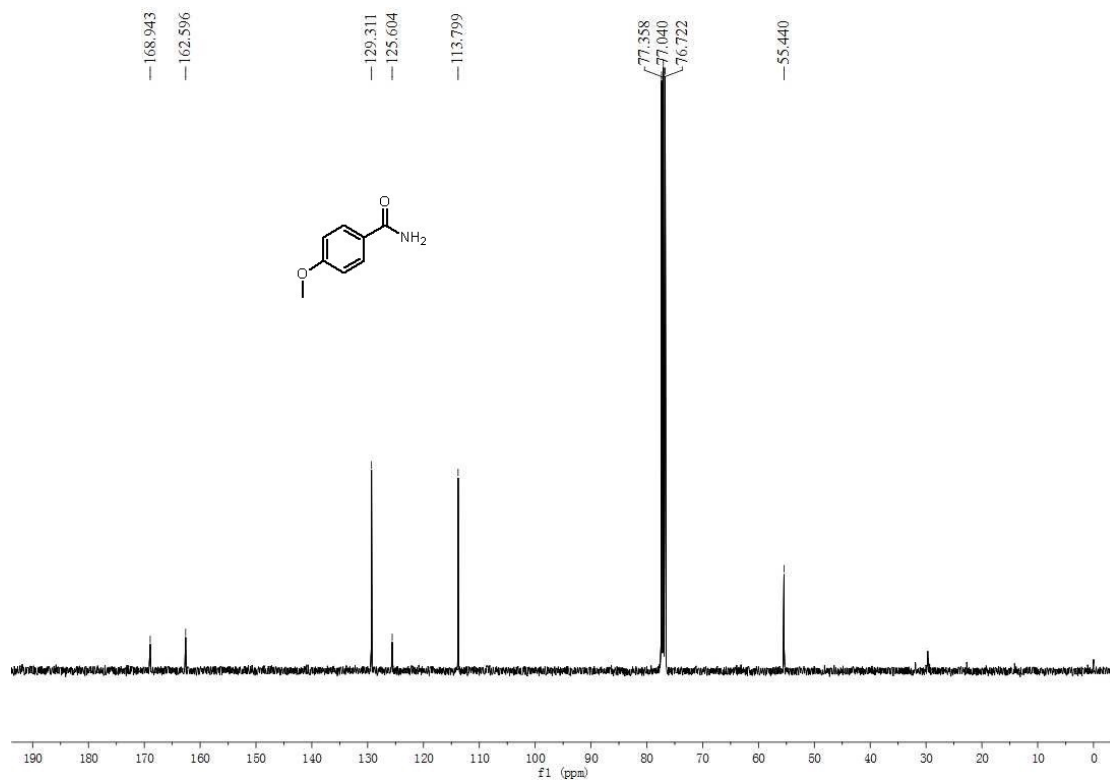

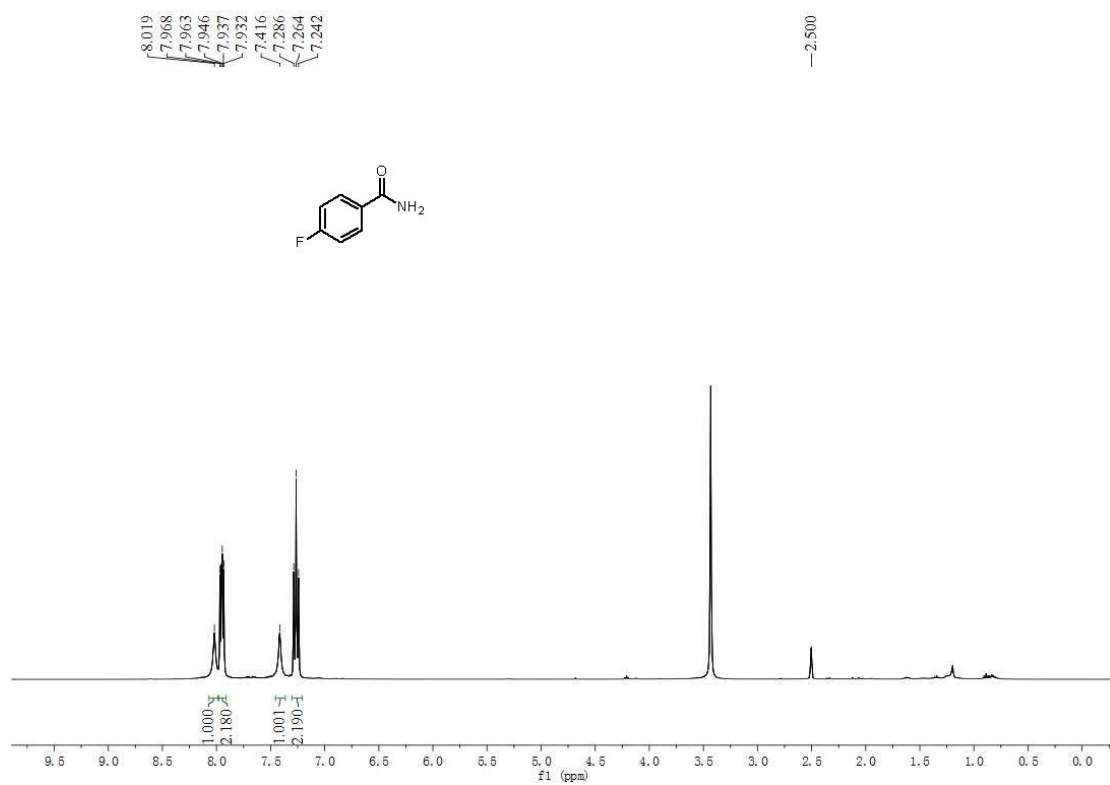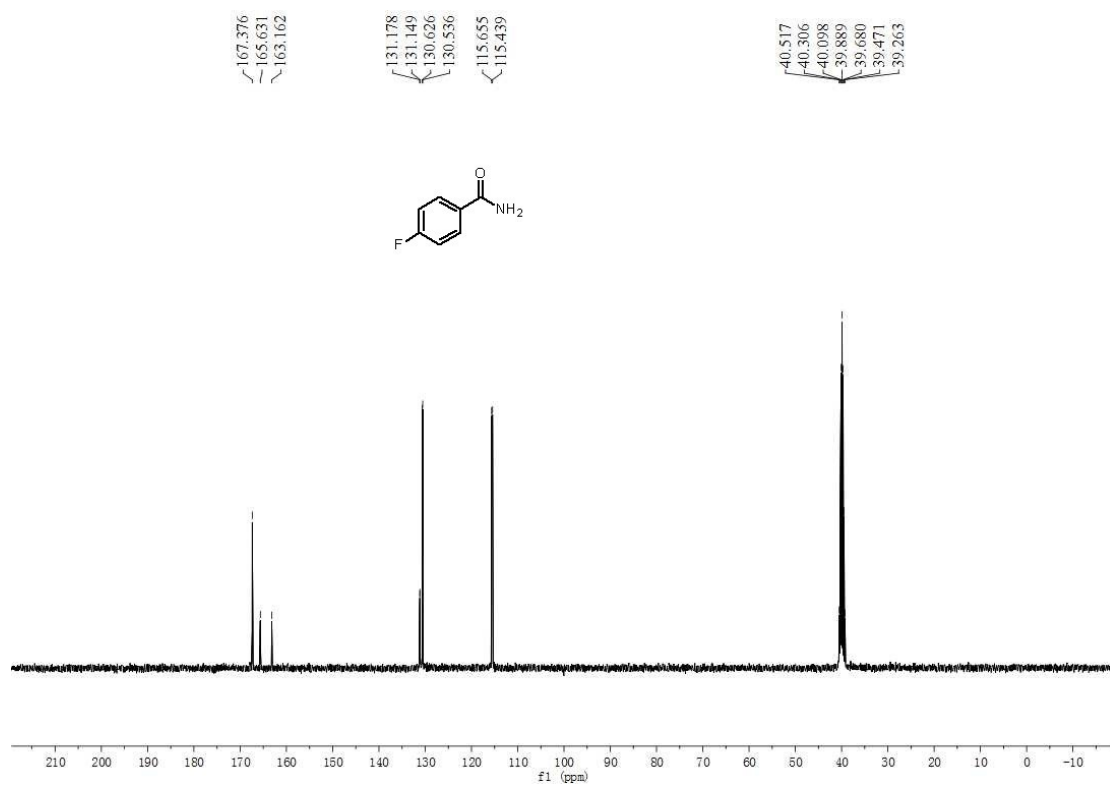

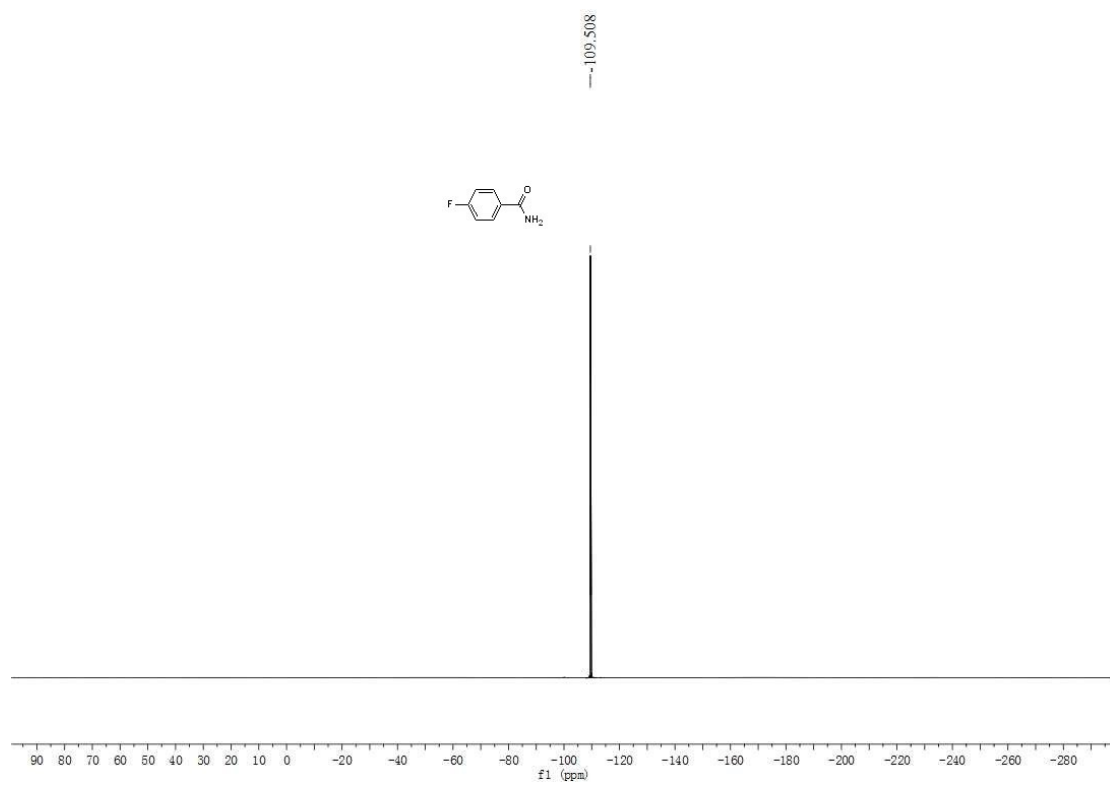

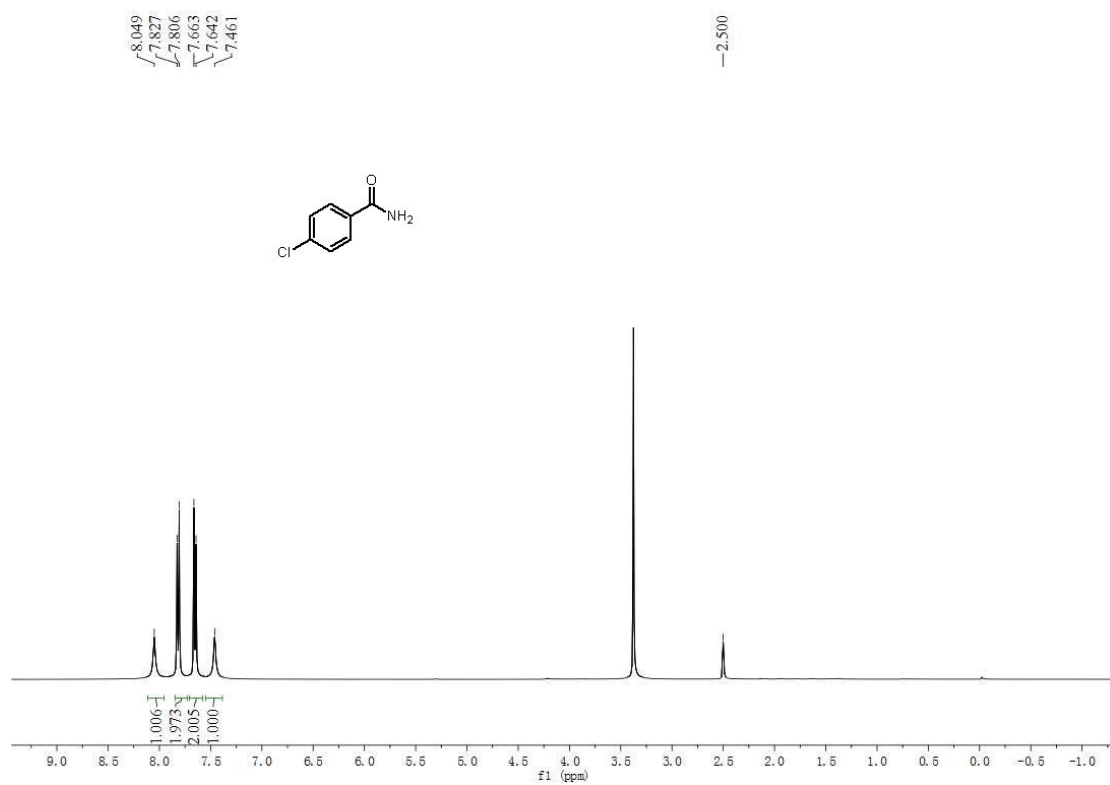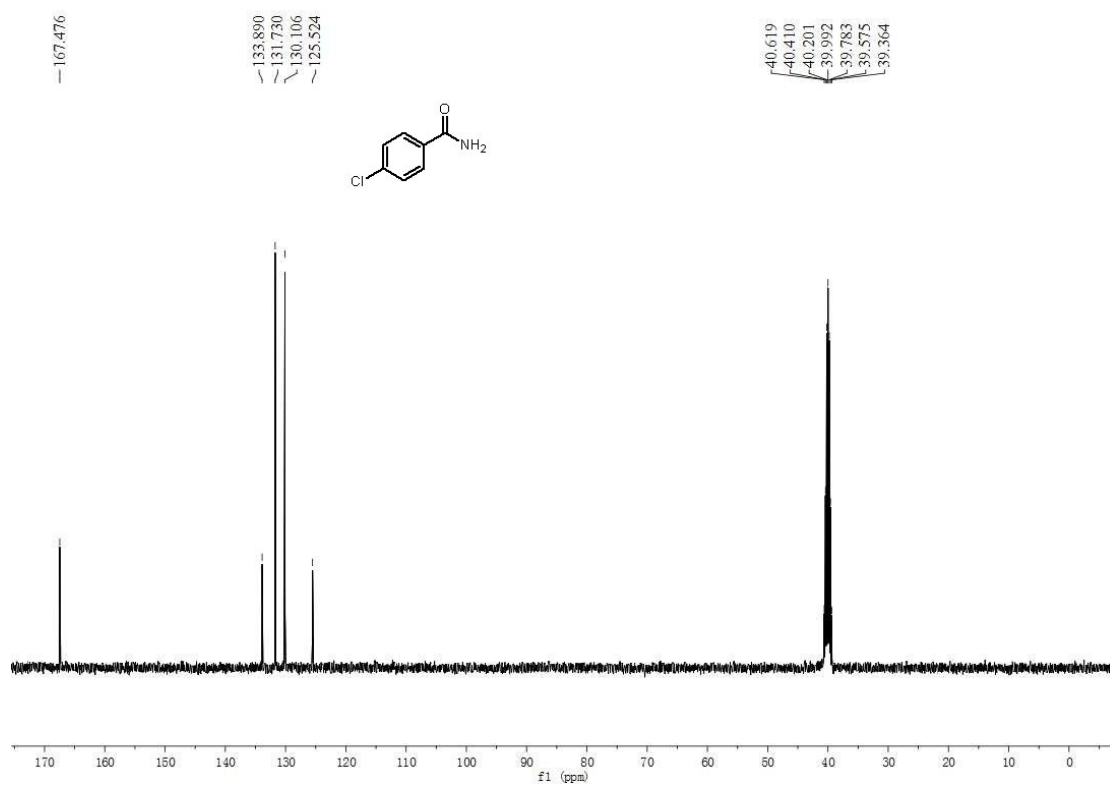

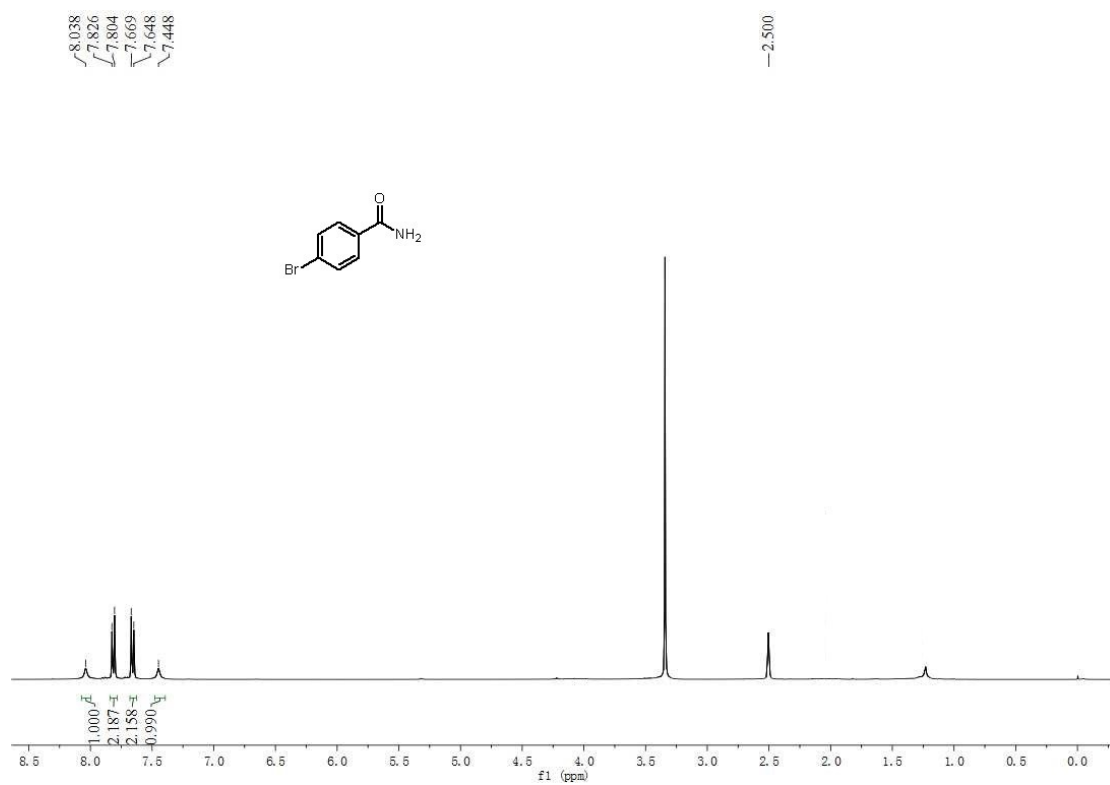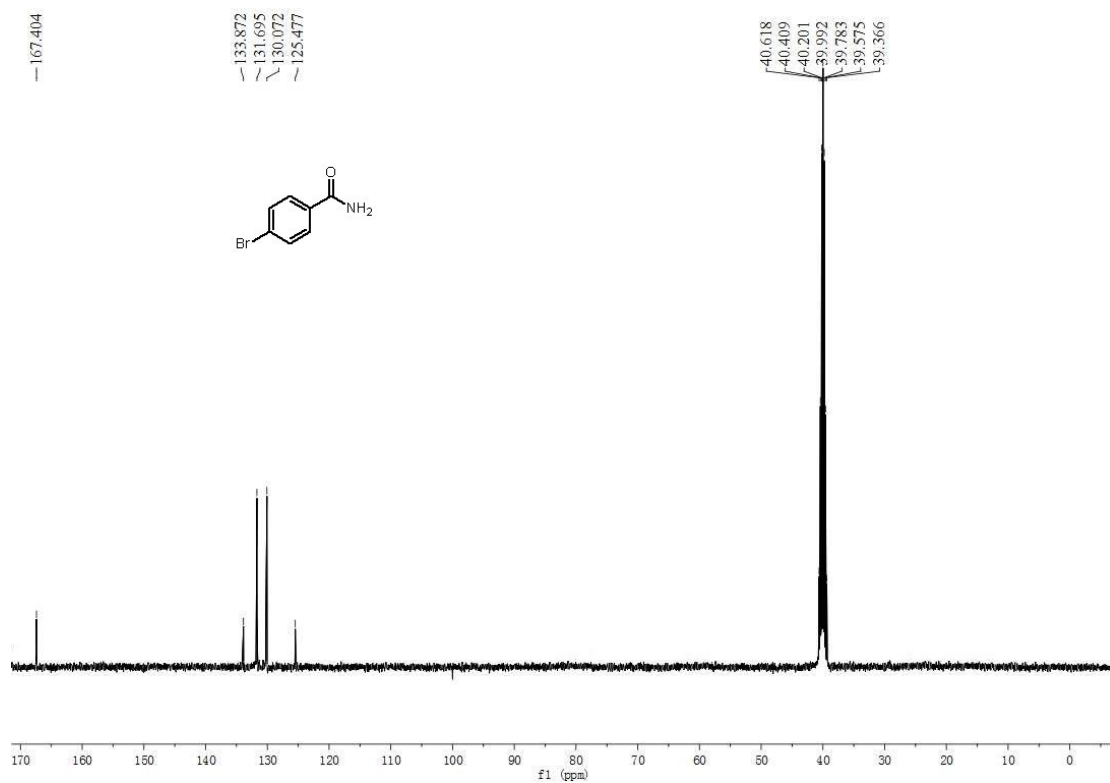

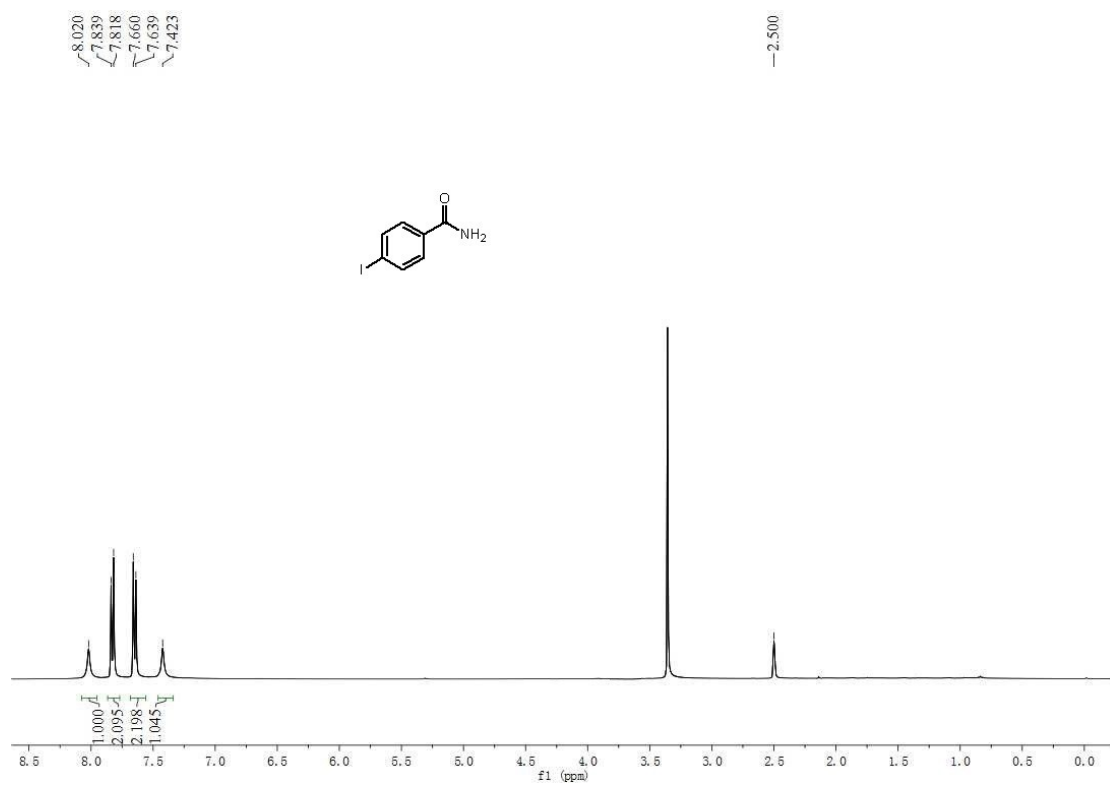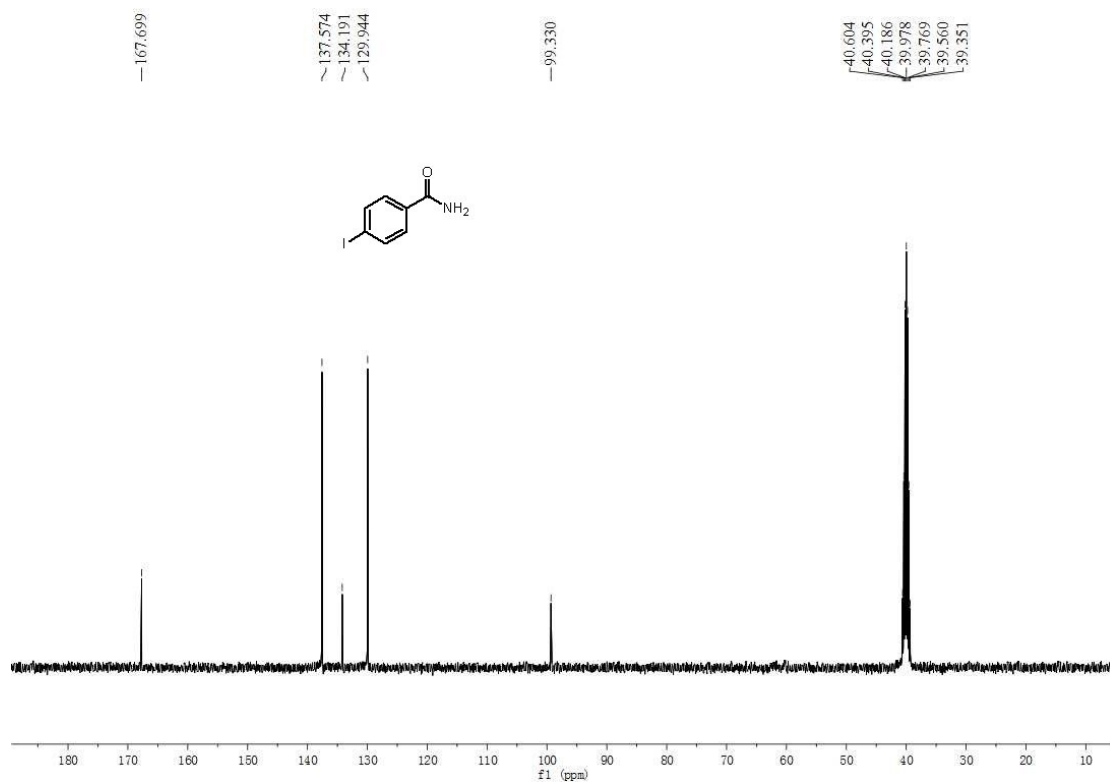

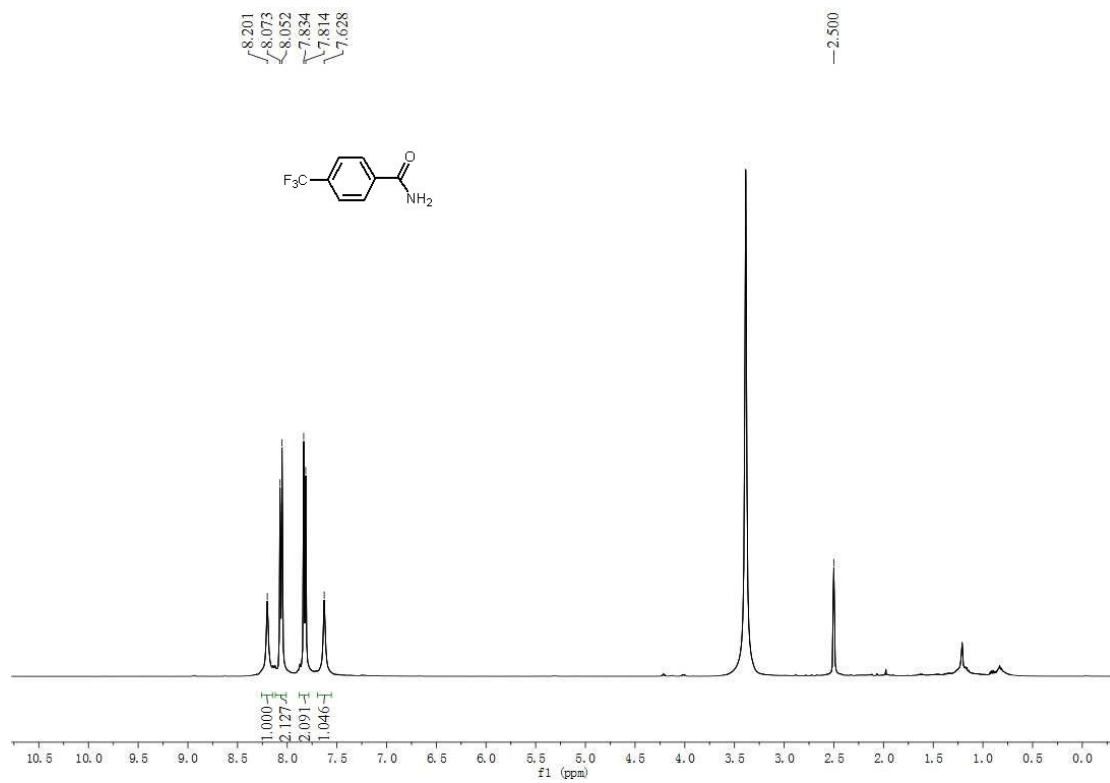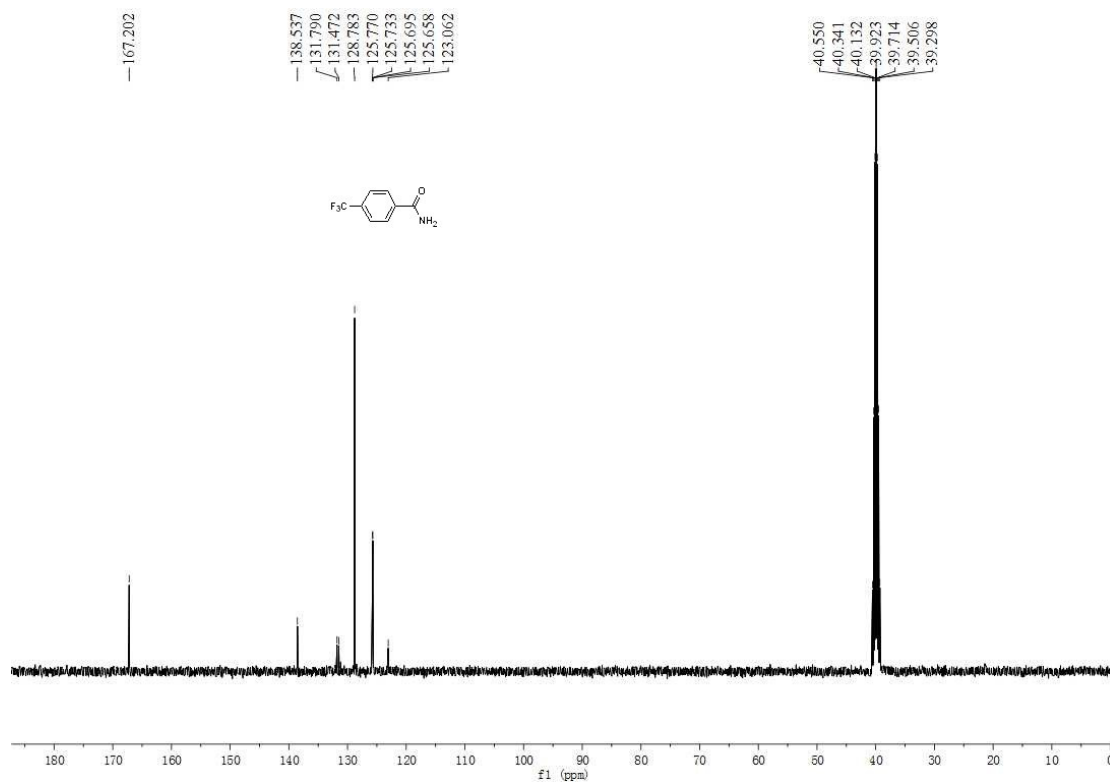



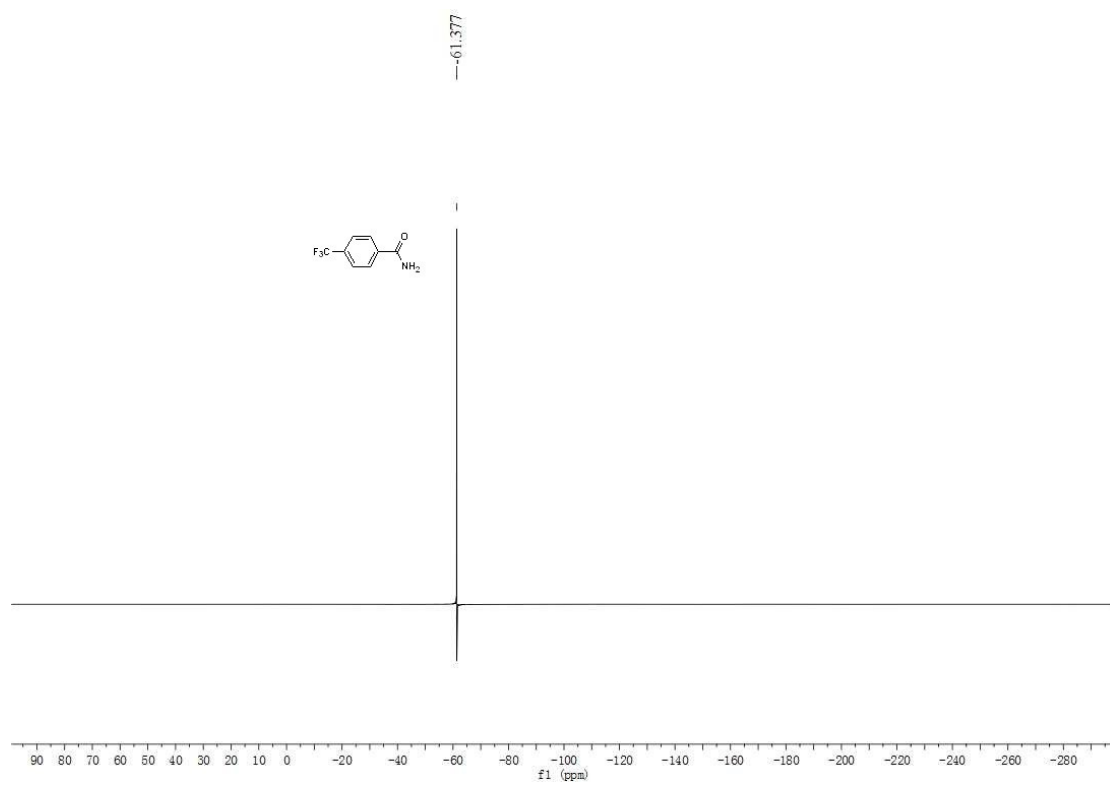

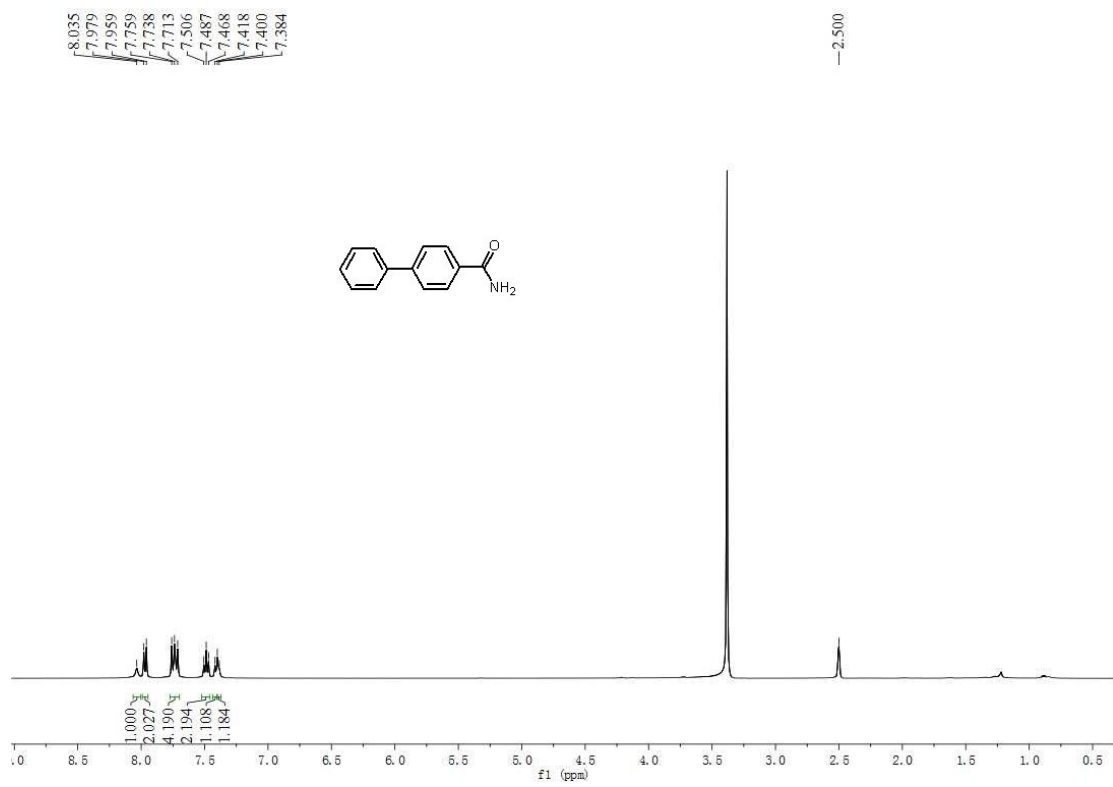

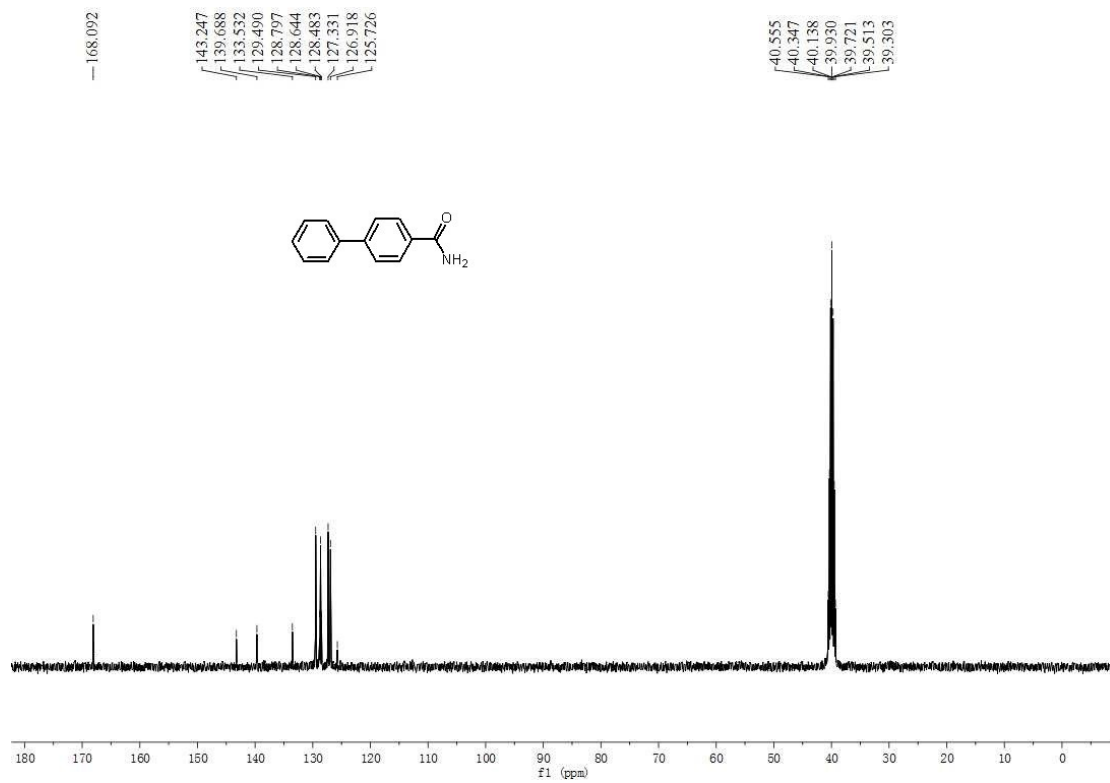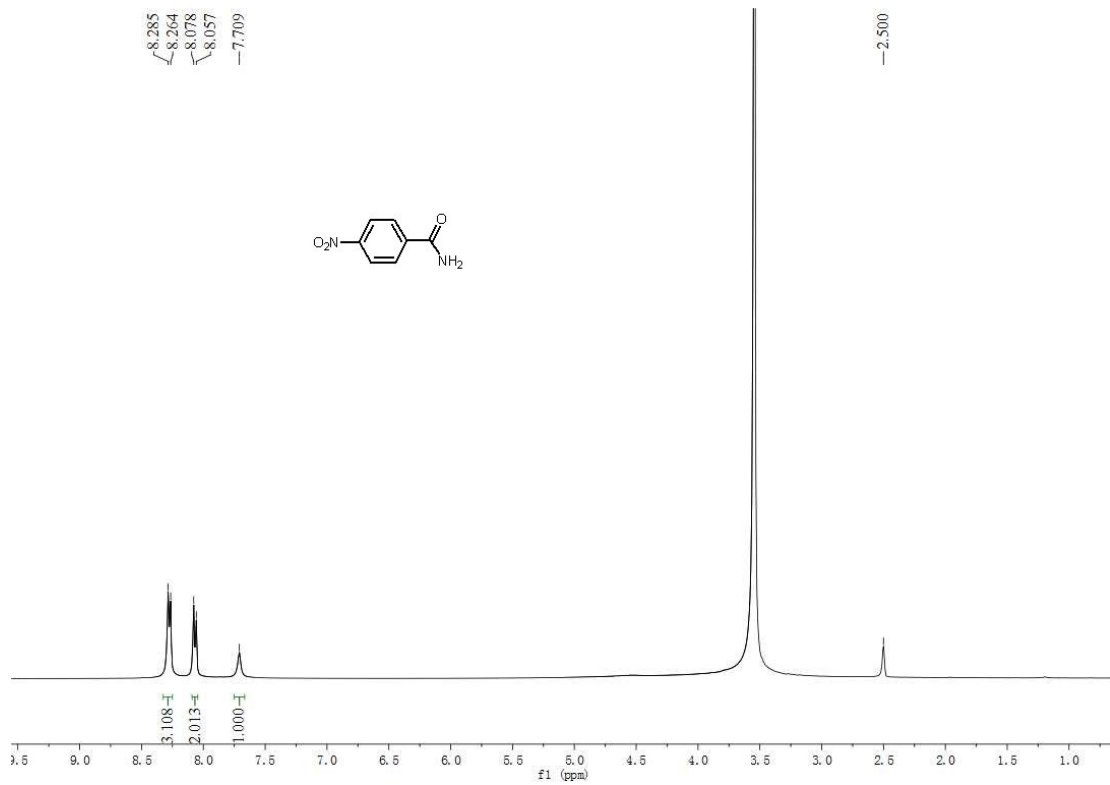

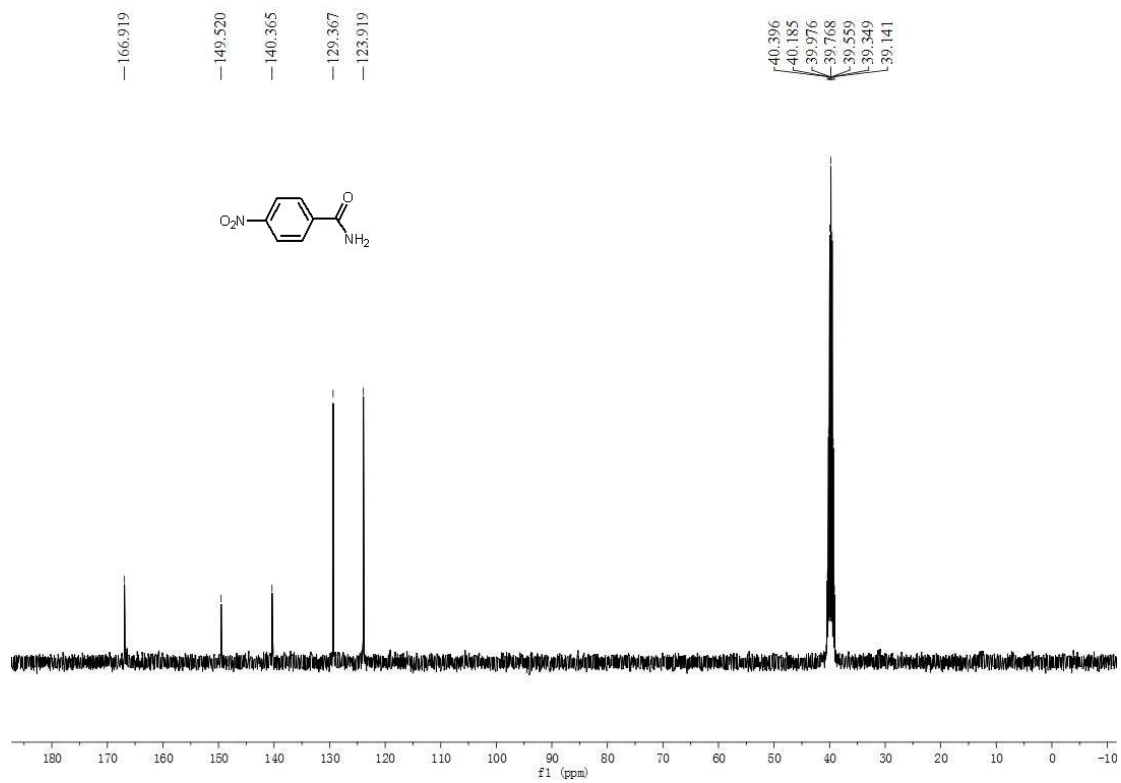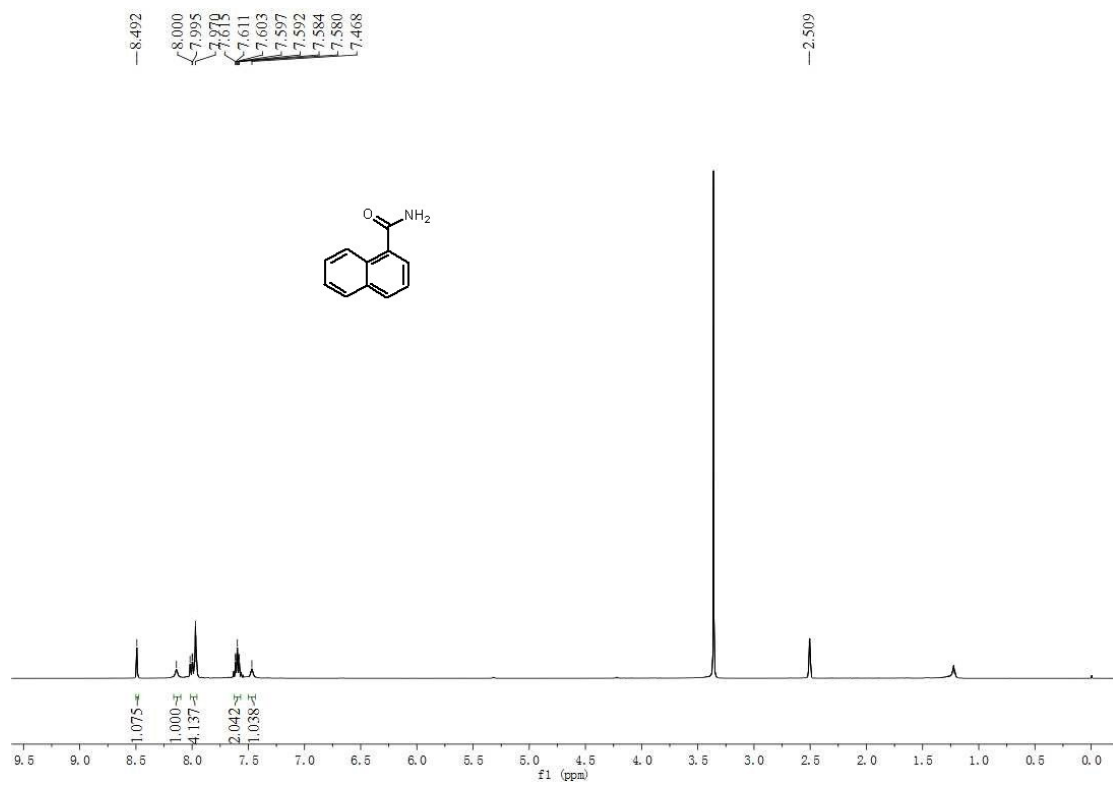

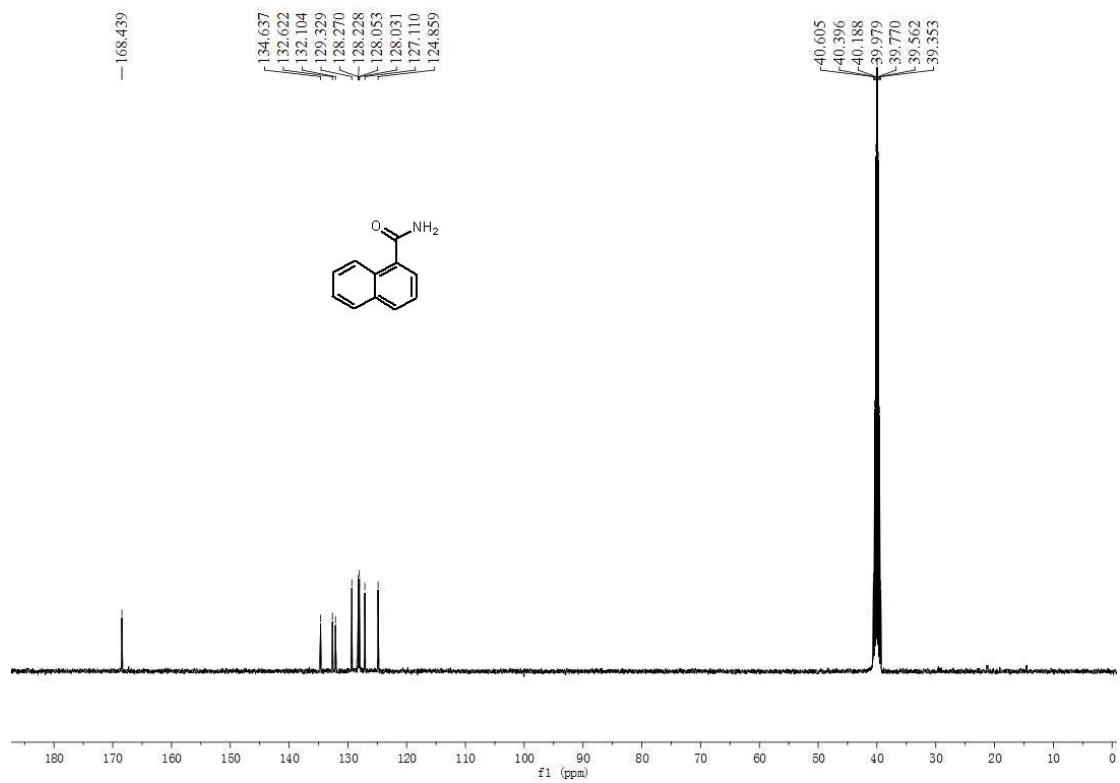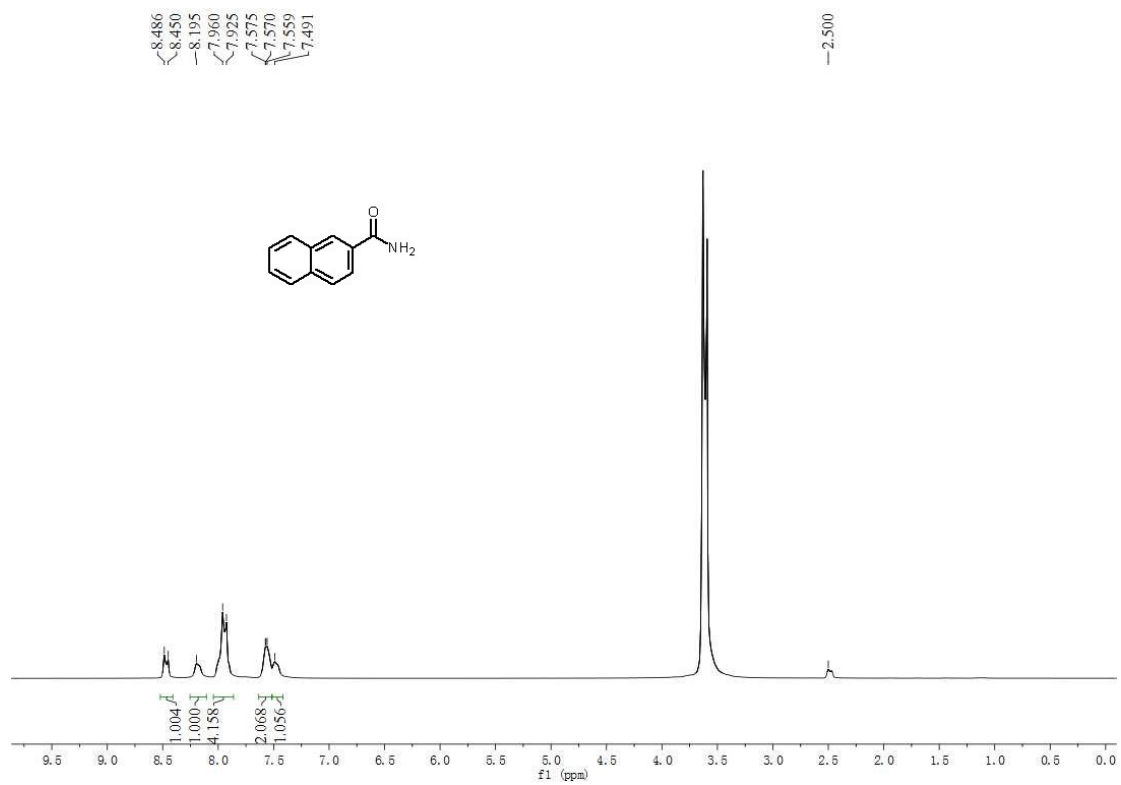

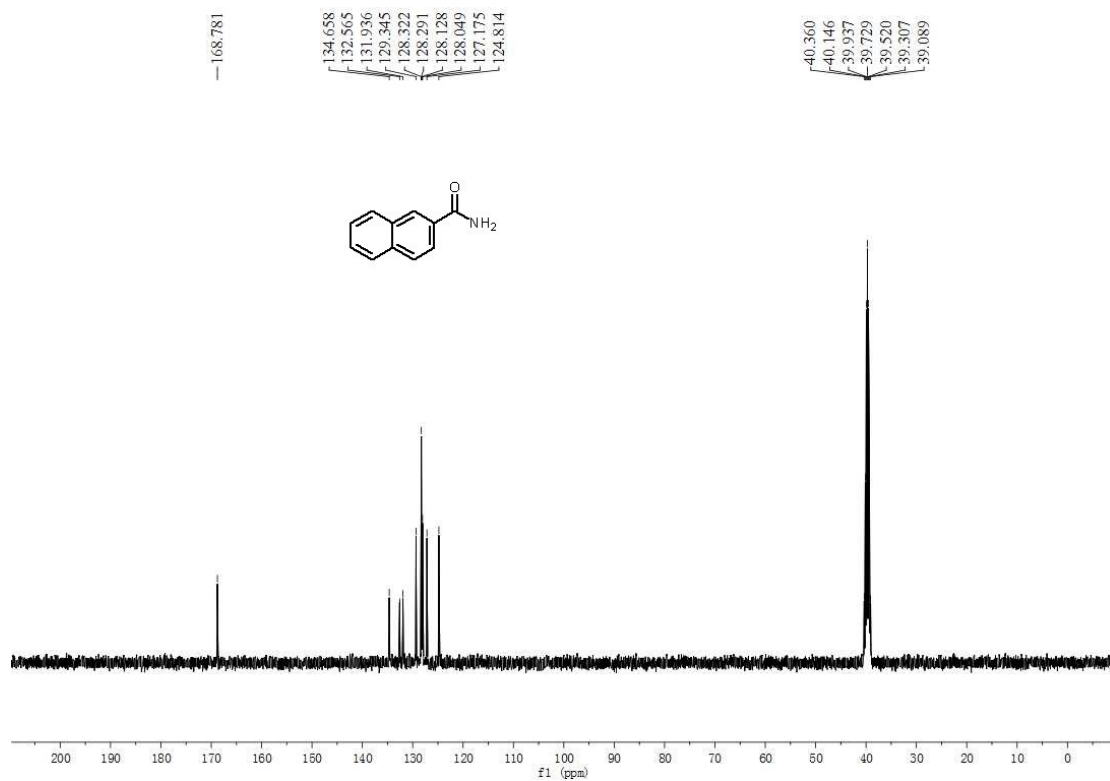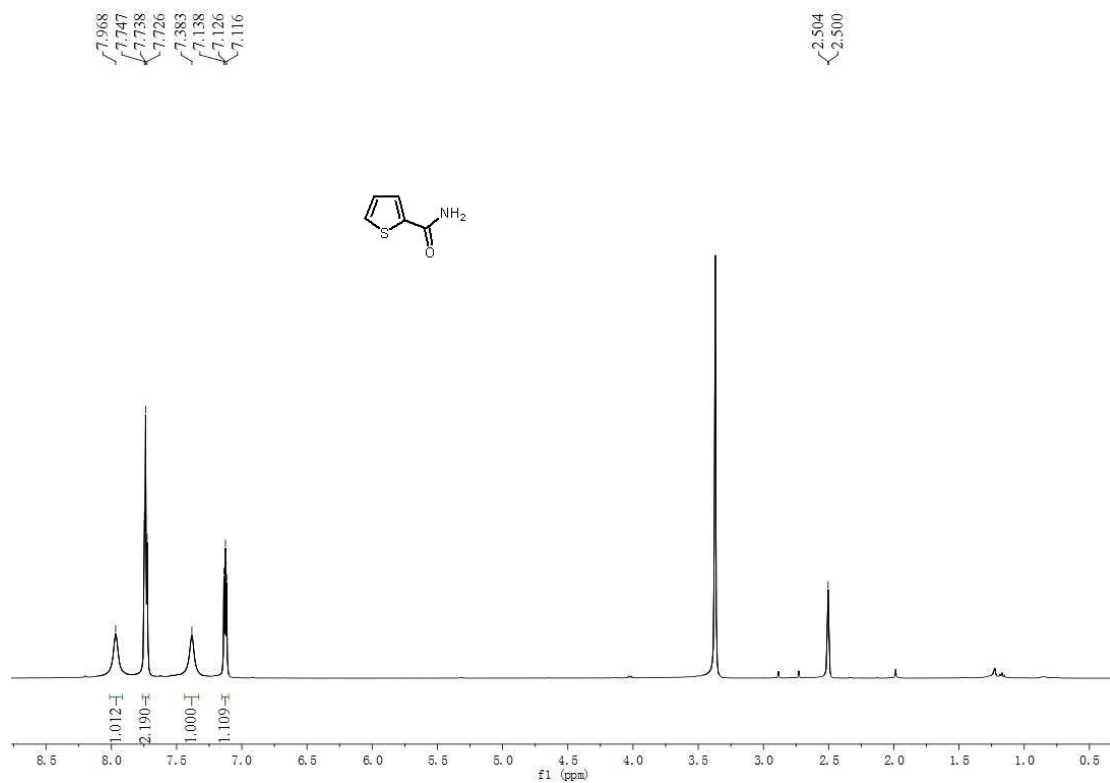

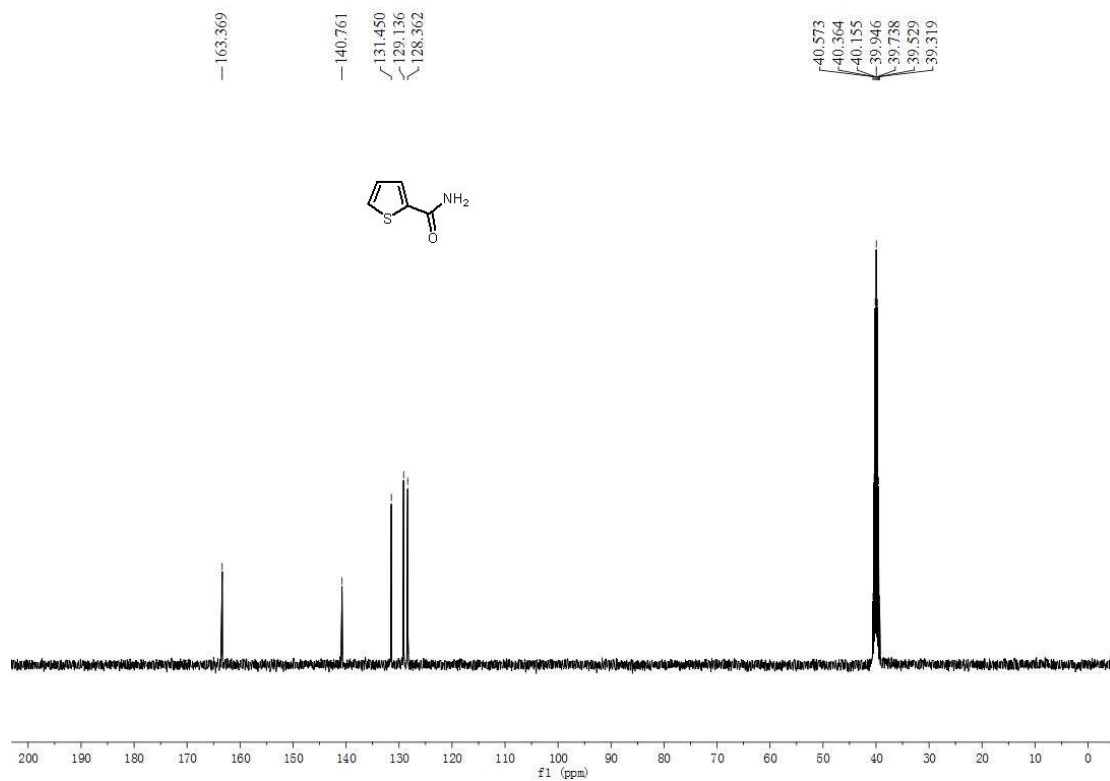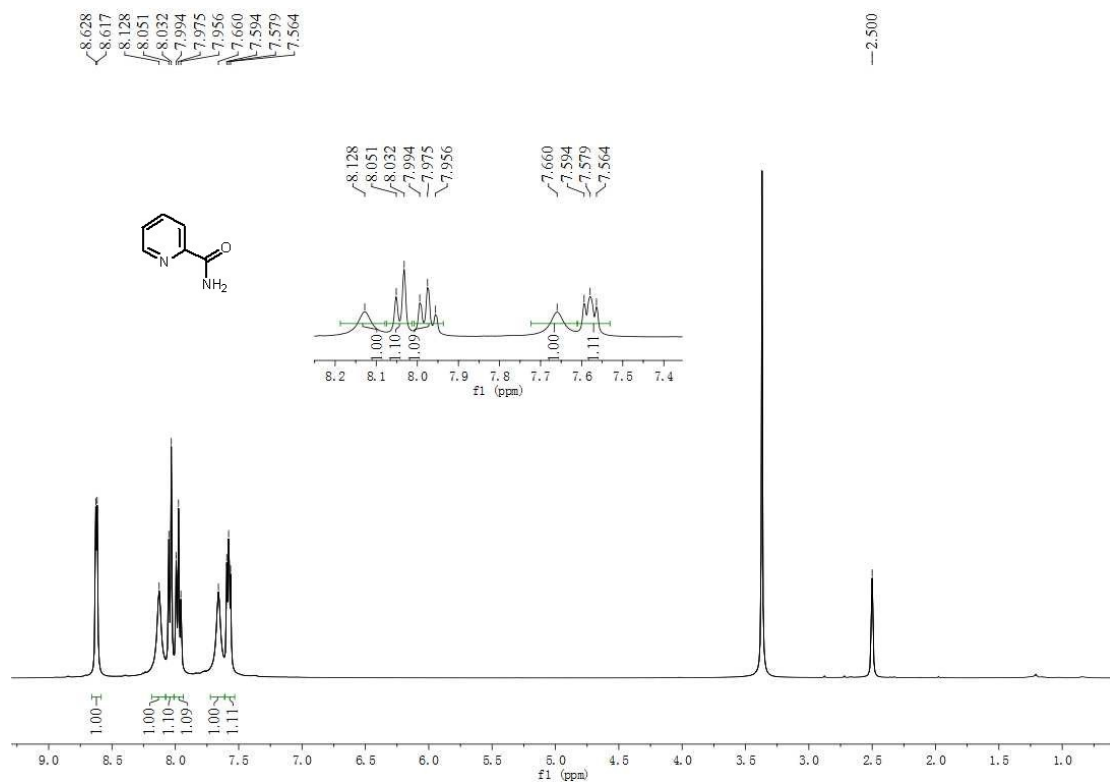

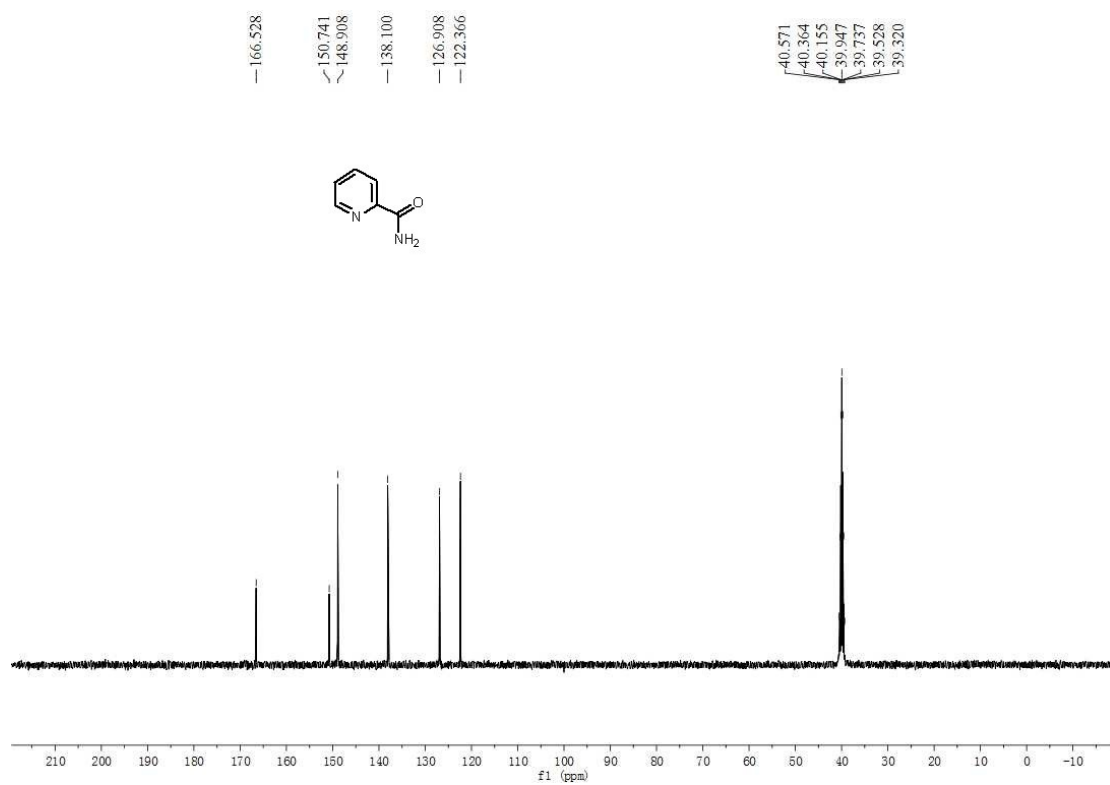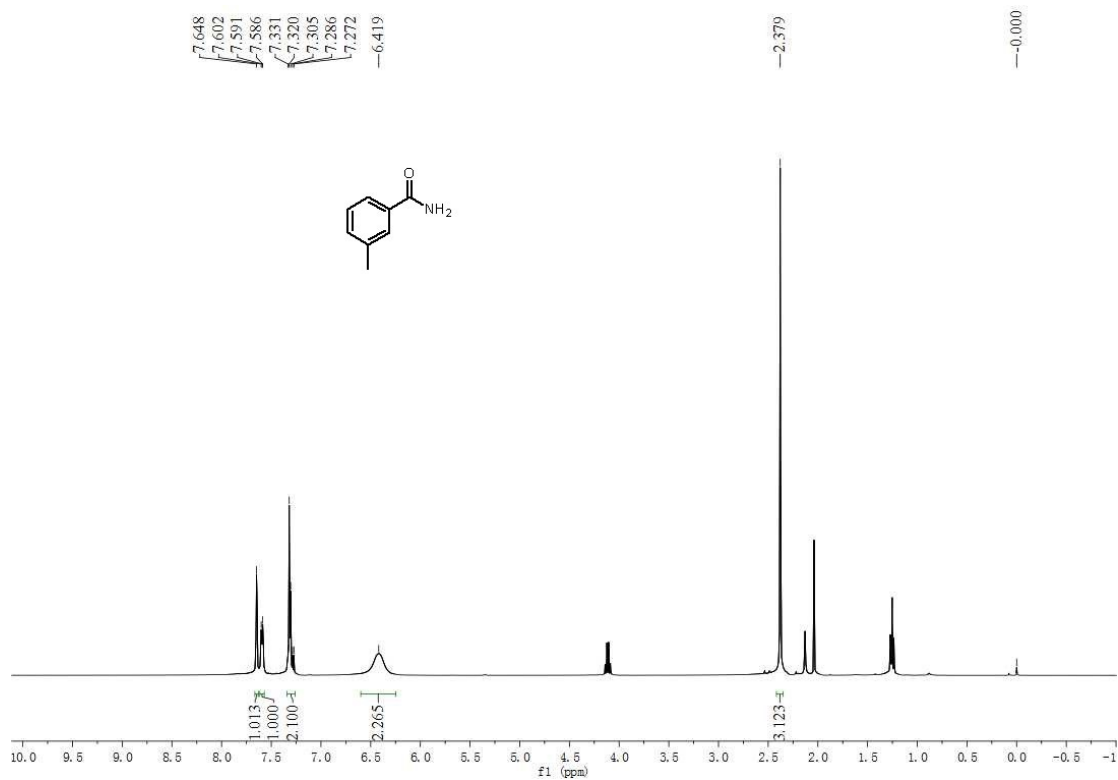



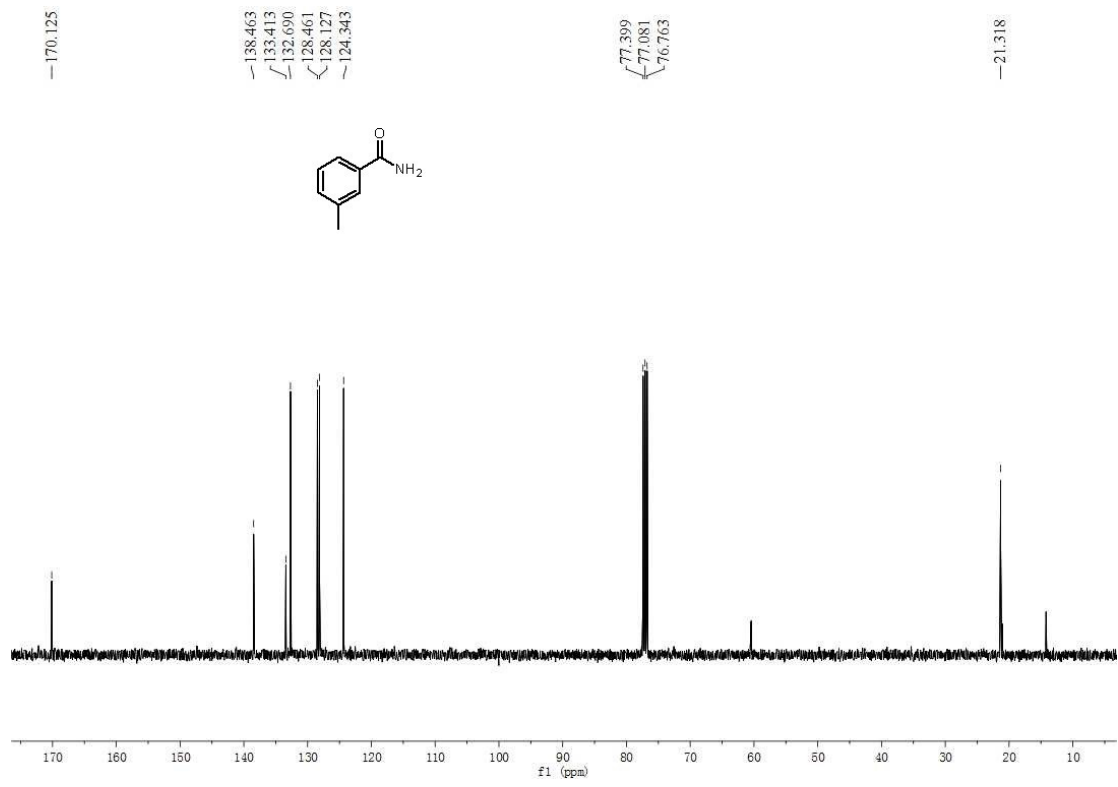

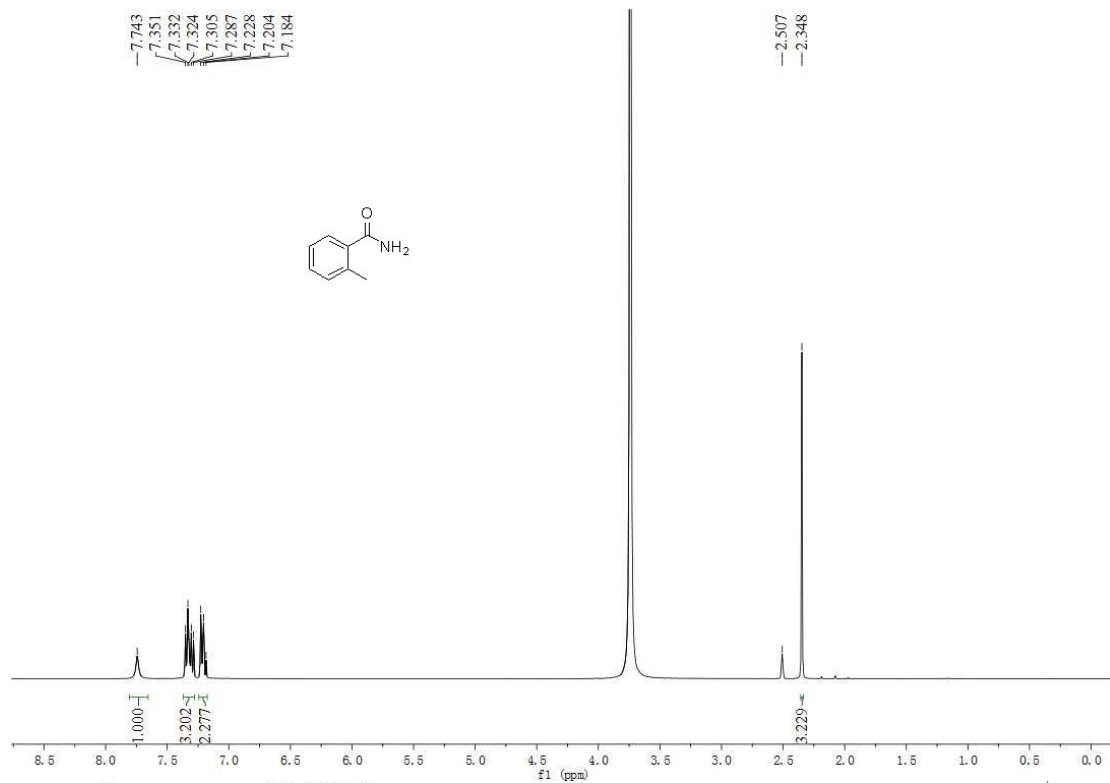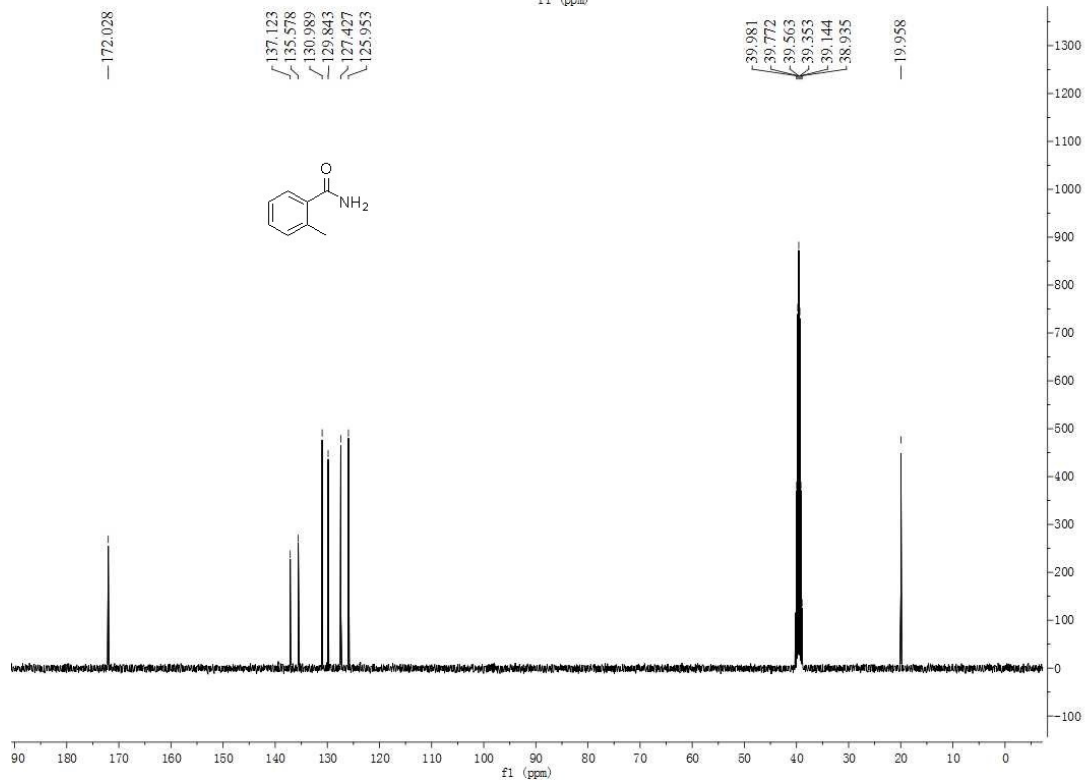

Supplement: c7ra02207g1.pdf [file c7ra02207g1.pdf]
